# Supplementary material
Source: publisher site journal article supplement (https://www.spandidos-publications.com/7560/downloadSupplementary)
Supplement: Supplementary file 1 [file downloadSupplementary]

## Sheet: PCA Loadings 
Table SI. PCA computation from image data.
Peak mass-to-charge m/z	PCA Loading 1	PCA Loading 2	PCA Loading 3	PCA Loading 4	PCA Loading 5
900.42	-0.0393921	0.00286813	0.00868512	-0.0317314	0.00385281
1128.53	-0.0392531	0.00751708	0.0118591	-0.0203957	0.000514125
1129.53	-0.0389604	0.00638058	0.0123762	-0.018121	-0.00053019
901.424	-0.0385964	0.006427	0.0134316	-0.0307417	0.00518647
1212.62	-0.0385634	-0.00500456	-0.00359519	0.0047787	0.0395796
1019.51	-0.0384445	0.00804719	-0.0152227	-0.023542	0.0309668
1020.51	-0.0383386	0.00752824	-0.0142075	-0.0222994	0.0295507
1081.43	-0.0383088	0.00236663	-0.0101193	-0.0254624	0.0223621
944.493	-0.0381772	0.00596325	0.0178399	-0.00891125	-0.00670996
671.361	-0.0380162	-0.00054929	0.0165091	-0.0253174	0.000585118
1211.62	-0.0379737	-0.00547347	-0.00672185	0.00293362	0.0371227
1175.55	-0.0378142	-0.00261542	-0.00646134	-0.0157758	0.0139774
897.445	-0.0377137	0.0130341	0.0274809	-0.0185247	-0.0179585
914.483	-0.0376856	0.000150169	0.0225843	-0.021163	-0.00107314
1033.48	-0.0376724	-0.00735828	0.015183	-0.0341696	0.00122602
891.433	-0.0375551	0.00719002	0.0184124	-0.0127543	0.000904137
1399.65	-0.0372986	0.0139002	-0.00332147	-0.0298251	0.0025104
970.509	-0.0370886	-0.021688	0.00765998	-0.0282664	0.0257226
1273.54	-0.036912	-0.0100236	0.0082979	-0.00203108	0.0330328
1213.62	-0.036722	-0.00460959	0.00135659	0.00629612	0.0340923
1082.43	-0.0366719	0.00227889	-0.00866254	-0.0231793	0.0213038
1142.51	-0.0366194	0.0193135	0.0092204	-0.0254495	-0.00728277
1226.62	-0.0365431	0.00737695	-0.00223297	-0.0286444	0.0111789
1441.6	-0.0364568	0.00369751	-0.00284828	-0.0199868	0.0232832
1083.42	-0.036439	0.000749587	-0.00907161	-0.0215425	0.0219657
886.451	-0.036417	-0.00905614	0.0124768	-0.0400079	0.00494101
1274.54	-0.0363481	-0.00989052	0.00997771	-0.000572162	0.0316379
1800.53	-0.036296	-0.00301087	0.0118654	-0.0213258	0.0127423
2038.62	-0.0362172	0.00263864	-0.0135595	-0.0184355	0.0293928
898.448	-0.0361288	0.0118883	0.0327102	-0.012203	-0.0150512
945.497	-0.0360703	0.0053303	0.0184724	-0.00438928	-0.00430516
1656.75	-0.0360523	0.0243458	-0.0207885	-0.0211378	0.0248286
1275.53	-0.0359428	-0.0101651	0.00981869	-0.00112384	0.0310843
1180.56	-0.0359423	0.0234071	-0.0166907	-0.0106427	0.0173498
1194.59	-0.0359407	-0.00434906	-0.00164352	0.0139777	0.034219
1176.55	-0.0357947	-0.00372553	-0.00529481	-0.014987	0.0135624
1179.56	-0.0356241	0.0256017	-0.0171276	-0.0121123	0.0180701
672.365	-0.0354979	-0.00265449	0.0165976	-0.0193445	0.00218219
1002.48	-0.0354962	0.0034663	-0.0132148	-0.00979282	0.0270961
1400.65	-0.0354267	0.0145422	-0.0015638	-0.0334654	-0.00165349
971.513	-0.0353875	-0.0202552	0.011423	-0.0247275	0.0252823
915.486	-0.0353215	0.00011047	0.0236079	-0.0162873	-0.00150107
1540.79	-0.0352764	0.01893	-0.0199338	-0.0152475	0.0207454
892.437	-0.0352027	0.00517088	0.0186207	-0.010464	0.00172109
1143.51	-0.0351829	0.0186043	0.0116066	-0.0221443	-0.0065998
733.282	-0.0351498	-0.00659936	0.0328775	-0.0240163	-0.00234093
860.404	-0.0350474	-0.000418143	0.00641822	0.0151215	0.0100883
1657.76	-0.0350183	0.0231984	-0.0199809	-0.0189523	0.0242186
1032.43	-0.0349399	-0.0240941	0.0141677	-0.028831	0.0208751
1545.65	-0.0349114	0.0322367	-0.00618799	-0.0103219	0.0159783
1001.51	-0.0348915	0.029114	0.00661953	-0.0330353	-0.00178818
887.454	-0.0348722	-0.00986519	0.0129913	-0.0346915	0.0054526
2424.69	-0.0348417	-0.00781249	-0.00232691	0.00316605	0.0346947
1442.6	-0.0347789	0.00350765	-0.00336613	-0.0172178	0.0213133
2422.68	-0.0347169	-0.00695952	0.00207932	0.00299652	0.0333271
1483.73	-0.0347158	0.0356765	-0.0170651	-0.012893	0.0192857
1401.65	-0.0347154	0.0112236	0.00285601	-0.02853	-0.000831921
1040.48	-0.0345955	0.0312078	0.0240854	-0.00716154	-0.0221397
1159.55	-0.0345524	-0.0159816	-0.00749044	0.0019147	0.0286045
872.46	-0.0345499	-8.42864e-05	0.0316119	-0.00744825	-0.0204892
1484.73	-0.0345416	0.0342157	-0.0149372	-0.011675	0.0191065
1002.52	-0.0344927	0.0255153	0.00902897	-0.0303035	4.55571e-05
1650.72	-0.0341046	0.0146379	-0.0208506	-0.0243867	0.0369364
1032.47	-0.0340524	-0.0207717	0.0275767	-0.0354051	-0.0035731
1075.49	-0.0340176	-0.00554872	0.00118748	-0.00631403	0.0110304
1651.72	-0.0339488	0.0146884	-0.02019	-0.0218638	0.0372407
962.483	-0.0339185	-0.00567639	-0.00757473	-0.0278877	0.0222703
962.342	-0.033909	-0.00957721	0.030309	-0.029397	-0.00266759
852.399	-0.0338624	-0.000514728	0.0102558	-0.0151247	-0.00125938
1541.8	-0.0338427	0.0182509	-0.0196023	-0.014145	0.0220918
1006.42	-0.0337887	0.0022306	0.0299946	-0.00807429	-0.010524
1794.59	-0.0337589	0.00516653	0.0244222	-0.00750974	-0.00376948
1034.48	-0.0337582	-0.00105786	0.00820181	-0.030293	0.00456941
1154.53	-0.0337479	0.0143095	-0.00768371	-0.0261378	0.0173154
1227.62	-0.0337467	0.00739842	-0.00325165	-0.0270289	0.00942095
1472.69	-0.0336844	0.00290344	-0.0170798	-0.0232495	0.0297403
976.404	-0.0336779	-0.00506048	0.0359442	-0.0209484	-0.00620386
1276.54	-0.0336657	-0.00981364	0.008016	0.000849939	0.0290384
1142.54	-0.0336522	-0.00242088	0.0154133	-0.0297667	-0.0189019
1629.74	-0.0335485	0.0103055	-0.00300083	0.00848404	0.0404929
841.418	-0.0335108	0.018445	0.0218278	-0.0110626	-0.0180515
735.281	-0.0334811	-0.00558237	0.0276747	-0.0180046	-0.00215217
1034.43	-0.0334475	-0.0224847	0.0113665	-0.0250853	0.0188044
1017.47	-0.0334382	-0.013214	0.0348914	-0.037235	-0.00982933
1063.44	-0.0333879	0.0249567	0.0112014	-0.0306958	-0.00727718
1473.69	-0.0333219	0.00211758	-0.016598	-0.0231609	0.0289307
1505.67	-0.0333145	0.0265131	-0.0172906	-0.03239	0.0225033
1195.59	-0.0332787	-0.00476524	-0.00350384	0.0117375	0.0325519
1021.51	-0.0332675	0.00609621	-0.0138744	-0.0214574	0.0225484
1485.73	-0.0332145	0.0300376	-0.0126094	-0.00952791	0.0168918
1122.55	-0.0331895	0.0388874	0.00562068	-0.00169308	-0.0134759
1208.55	-0.033166	0.00186754	-0.0170241	0.010025	0.0321758
1590.81	-0.0330994	0.0169175	-0.0245755	-0.0206507	0.0374937
1546.65	-0.0329802	0.0295197	-0.00640996	-0.00936339	0.0154941
1773.79	-0.0328896	0.0301195	-0.0249915	-0.0198193	0.0244474
1589.81	-0.0328357	0.0184261	-0.0263783	-0.0227585	0.0376088
1410.68	-0.0328094	0.0340609	-0.0158841	-0.00468363	0.0236207
1772.79	-0.0327532	0.0309436	-0.0247174	-0.0196484	0.0250474
1160.54	-0.032716	0.0156408	0.00931285	-0.0152891	-0.0105593
1115.55	-0.0326822	0.0229647	0.0357987	-0.0116819	-0.0254605
1411.68	-0.032643	0.0321472	-0.0168172	-0.00302698	0.0230304
1197.64	-0.0325947	0.0103883	-0.00905251	-0.0155328	0.00747366
1777.83	-0.0325406	0.0167239	-0.0294488	-0.00291047	0.0454036
1033.43	-0.0325108	-0.0222973	0.0110071	-0.0242458	0.0196578
1672.77	-0.0324755	0.0303595	-0.0184794	0.0182783	0.0267861
1130.54	-0.0323813	0.00425123	0.00538652	-0.0142484	0.00229181
1675.79	-0.0323256	0.0318079	-0.0224981	-0.0142609	0.026334
849.391	-0.0323045	-0.012169	0.0267915	-0.0227736	-0.0142509
1588.69	-0.0322452	0.00764079	-0.00054899	0.0185171	0.0185642
1778.84	-0.0322393	0.0161975	-0.0300313	-0.00280923	0.0444493
1506.67	-0.0322118	0.0254486	-0.0176515	-0.0305751	0.0223582
620.318	-0.0321782	-0.0205781	0.0194799	-0.0210289	0.00123485
1480.75	-0.0321774	-0.0028596	-0.00617556	-0.0014177	0.044567
1131.54	-0.0321585	-0.0117217	0.0334099	-0.0279209	-0.0113427
2096.02	-0.0321329	-0.00522899	-0.0185664	-0.00713456	0.0486529
1137.42	-0.0320855	-0.00832473	0.012689	-0.00995206	0.00624497
2095.01	-0.0320829	-0.00565146	-0.0183894	-0.00681583	0.0484998
1589.7	-0.0320483	0.00545515	-0.00531442	0.0228828	0.0195569
1481.75	-0.0320216	-0.00240525	-0.00510932	-0.00134215	0.0438845
812.403	-0.0320187	0.0118542	0.0380929	-0.0142351	-0.0135291
1571.77	-0.0320057	0.0161662	-0.0255924	-0.0165918	0.0387464
1041.48	-0.031985	0.0284122	0.0267827	-0.00238573	-0.022688
928.463	-0.0319688	0.00230384	0.0388898	-0.00115985	-0.00334151
948.372	-0.0319601	-0.0142865	0.0253413	-0.0423124	-0.00218714
882.445	-0.031936	0.00986476	-8.45303e-05	-0.00667572	-0.000782703
1588.8	-0.0318898	0.0166105	-0.0214711	-0.0197123	0.0414949
1102.57	-0.0318789	0.0268518	-0.00970349	-0.015616	-0.00120628
1188.56	-0.0318568	-0.00909494	0.0313746	-0.0286547	-0.00688525
1169.59	-0.0318526	-0.00514921	-0.00111417	0.00308653	0.0258784
1460.69	-0.0318492	-0.0212452	-0.00301003	0.00442901	0.0470944
1673.78	-0.0318142	0.0294963	-0.0179926	0.0165417	0.0265847
1043.49	-0.0317993	-0.00991887	0.00832448	-0.0175539	0.0024926
1630.74	-0.0317752	0.00942156	-0.00353695	0.00823464	0.0386628
1384.68	-0.0317646	0.0167436	0.00198989	-0.0200901	0.0071091
978.404	-0.0316516	-0.00497307	0.0304622	-0.0159997	-0.00470189
1181.57	-0.0316394	0.0151948	-0.0122663	-0.00667623	0.016311
1631.75	-0.0316357	0.0135645	-0.00738483	-0.0102182	0.0323533
953.482	-0.0314856	-0.0164997	0.000703509	-0.00764468	0.020856
1205.57	-0.0314601	0.00661062	-0.00953162	-0.0353907	0.0148255
873.464	-0.0314295	-0.00130302	0.0296596	-0.00313877	-0.0149324
2256.58	-0.0314281	0.00444433	0.00235618	-0.0198142	0.00793973
1461.69	-0.0313886	-0.019847	-0.00383621	0.0040229	0.0448282
928.488	-0.0313796	-0.00986636	0.0117282	-0.0161973	-0.0112025
1008.41	-0.0313546	0.00084333	0.0244107	-0.0070087	-0.00840711
1084.43	-0.0313136	0.00345603	-0.00993378	-0.0203262	0.0191037
1018.48	-0.0312594	-0.0118807	0.0349811	-0.0310521	-0.00770632
1139.59	-0.0312466	0.045738	-0.00644247	0.00901778	-0.0134351
1116.55	-0.0312165	0.0199397	0.0344659	-0.00618874	-0.0213502
654.334	-0.0312143	-0.0015884	0.013353	-0.00422191	0.00301241
1686.53	-0.0311797	-0.00336337	0.0434009	-0.00720538	-0.0097101
1123.56	-0.0311496	0.0346551	0.00781899	0.000593676	-0.0109859
1145.56	-0.0310844	0.0105651	0.0279224	-0.0131411	-0.0287978
1140.6	-0.0310819	0.0442409	-0.00254699	0.00999725	-0.0124052
1058.52	-0.0310456	-0.0145675	0.00903815	-0.0223572	-0.0110867
1072.53	-0.0310053	-0.0324397	0.00447611	0.0054149	0.045528
977.409	-0.0309194	-0.00464415	0.0293624	-0.0154091	-0.00229469
1652.72	-0.0309107	0.0138759	-0.0199417	-0.0195495	0.0343479
1774.8	-0.030886	0.0284196	-0.0226873	-0.0185623	0.0246342
1214.63	-0.0308676	3.27992e-05	-0.00587936	-3.02937e-05	0.025336
843.398	-0.0308399	0.000560755	0.0553818	-0.017377	-0.0202928
1386.69	-0.0308296	0.00628344	-0.00706729	0.00800237	0.0456535
1845.8	-0.0308068	0.0189601	-0.0231957	0.00479903	0.0307408
1497.75	-0.030804	0.0291955	-0.0116902	-0.012229	0.0163129
869.425	-0.0307735	-0.00442288	0.00237245	-0.0162949	0.00894544
984.489	-0.0307267	0.0204089	0.00317842	-0.0140655	0.00649385
556.323	-0.030708	-0.00294801	0.0432563	-0.0105149	-0.0367335
2358.6	-0.030688	0.016805	-0.0196403	-0.00950972	0.0206224
1115.51	-0.0305913	0.00212866	0.0108649	-0.0149836	0.00778182
1653.72	-0.0305266	0.0136752	-0.0200679	-0.0218844	0.0327377
1221.47	-0.0305252	-0.017846	-0.00102079	0.000372574	0.0224887
1270.47	-0.0304852	0.000665254	-0.0131449	0.00789394	0.0279871
899.452	-0.0304603	0.00748908	0.0259986	-0.00525899	-0.00904022
1007.42	-0.0304518	-6.11838e-06	0.0232664	-0.00506808	-0.00652099
1064.44	-0.0304418	0.0166751	0.0089306	-0.0243154	-0.00303502
1547.65	-0.0304214	0.0253438	-0.00620379	-0.00806816	0.0164764
1160.56	-0.0303968	-0.0158294	-0.00770059	0.00426876	0.0285418
1658.76	-0.0303828	0.0188607	-0.0204967	-0.0123502	0.0242749
1462.59	-0.0303253	-0.00404818	-0.000138766	0.0342718	0.0312307
964.339	-0.0303161	-0.0068162	0.0267122	-0.0250158	0.000253804
734.285	-0.0302414	-0.00570742	0.0273374	-0.0164105	0.000351316
1676.79	-0.0302303	0.0301685	-0.023448	-0.0164756	0.025323
1161.58	-0.0302163	0.00278011	0.006842	0.00975035	0.0312537
1233.6	-0.0301795	-0.00212322	0.0132609	0.00657974	0.0397788
1065.43	-0.0301759	0.0203233	0.0113044	-0.0229414	-0.00703668
1089.46	-0.0301582	-0.00295284	-0.00532937	0.0112337	0.0176379
1461.57	-0.0301477	0.00421371	0.0199529	-0.0238626	0.00130202
927.468	-0.030067	0.00562218	0.0103741	0.00528928	-0.00134934
1943.9	-0.0299792	0.0336751	-0.0247861	-0.00807137	0.0212661
950.371	-0.0299534	-0.0137366	0.0201757	-0.0362935	-0.000118106
824.439	-0.0299007	-0.00757407	0.00485363	-0.00636686	0.00254221
1940.66	-0.0298396	-0.0164271	0.00519712	-0.0187565	0.0257576
570.336	-0.0297898	-0.024916	0.0287071	-0.016411	-0.00216003
842.422	-0.0297811	0.0144282	0.0216318	-0.00793088	-0.0158067
2284.53	-0.0296914	0.0118698	0.0076374	-0.0182501	0.0040054
1840.76	-0.0296844	0.0139898	-0.0259433	-0.00144852	0.0420926
1839.76	-0.0296765	0.0150396	-0.026717	-0.0027245	0.0423547
1430.64	-0.0296133	-0.0151451	0.0073341	-0.0133862	0.0355764
1611.72	-0.0296123	-0.0033079	-0.00475024	0.00735234	0.0402868
963.345	-0.0296056	-0.00412429	0.0240527	-0.0263007	-0.00012573
616.318	-0.0295748	-0.0181569	0.0223138	-0.0358983	-0.00360446
1155.51	-0.0295599	-0.0322614	0.0106131	-0.00601456	0.0252517
1830.91	-0.0295411	0.0320564	-0.0228826	-0.00755452	0.0213096
902.426	-0.0295215	0.00544451	0.00849502	-0.0219249	0.00369621
1474.7	-0.0295115	0.0126706	-0.0122553	-0.0120989	0.0165241
1942.89	-0.0294857	0.0328134	-0.0238166	-0.00648008	0.0228167
1387.7	-0.0294598	0.00595701	-0.00569026	0.00973444	0.0445638
1829.91	-0.0294541	0.032548	-0.0233937	-0.00771326	0.0212727
1572.77	-0.0294336	0.0173953	-0.0253916	-0.016289	0.0373226
955.506	-0.0294307	0.0230865	0.0156835	-0.00861487	-0.018125
1397.59	-0.0293983	0.00197942	-0.0166493	0.0152951	0.0335035
1421.63	-0.0293065	0.0111371	0.0181633	-0.0115601	0.0199208
1463.59	-0.0293054	-0.00393297	-0.000972395	0.0285365	0.0294526
1154.59	-0.0292953	0.0112614	0.00364072	-0.0361156	0.00716652
999.524	-0.0292741	0.0112913	0.0121298	-0.0124924	-0.0159026
1303.66	-0.029249	0.0436919	-0.00769093	-0.00157876	0.0040789
1103.57	-0.0292274	0.0235296	-0.00987833	-0.0151671	0.00100015
954.501	-0.0292192	0.0257355	0.0129353	-0.0127801	-0.0240545
1861.81	-0.0291553	0.0264026	-0.0182222	0.0253009	0.0277047
1542.67	-0.0291532	-0.00603439	0.000353669	-0.00200935	0.0399847
1045.55	-0.0291396	0.0318856	-0.00997488	-0.0259953	-2.95341e-05
844.401	-0.0290932	0.00015121	0.0569652	-0.0128246	-0.0223504
1834.72	-0.0290558	0.0266267	-0.0154663	-0.0208562	0.0219248
1302.66	-0.0290546	0.0452348	-0.00886431	-0.00213747	0.00409396
858.407	-0.0290538	-0.0361381	0.0248417	-0.0182792	0.0319165
1459.71	-0.02905	0.0395933	-0.0086385	-0.00340683	-0.00518201
922.402	-0.0289182	0.00355049	0.0291073	-0.0141249	0.0186383
1846.8	-0.0289073	0.0191567	-0.0229127	0.00435075	0.0305088
1003.48	-0.0288491	0.00524671	-0.0128937	-0.00947112	0.0223541
949.375	-0.0288039	-0.0132892	0.018521	-0.0335011	0.000909171
1190.45	-0.0287951	0.00736721	0.0216631	-0.0174159	-0.0079701
1567.6	-0.0287702	0.0249441	-0.0108394	-0.0285881	0.019446
957.478	-0.0287519	-0.0135536	0.00931035	-0.0371924	0.00512769
1189.57	-0.0287476	-0.00804498	0.0237476	-0.0240877	-0.00726078
1704.84	-0.0287335	0.0245936	-0.0221083	-0.0244632	0.0205774
1396.69	-0.0286566	-0.00779872	-0.00641073	0.00666273	0.0349036
1466.71	-0.0286411	0.0275084	-0.0130404	0.000154198	0.0198246
1458.7	-0.0286264	0.0406768	-0.0104467	-0.00409198	-0.00640308
859.412	-0.0285974	-0.031187	0.0235299	-0.0145056	0.0295402
813.407	-0.0285589	0.00978429	0.0329531	-0.00990852	-0.0116329
929.465	-0.0285365	0.00148738	0.0381354	-0.000793875	-0.00181188
900.493	-0.0284838	-0.0147856	0.0312407	-0.013546	-0.0159599
1143.55	-0.0284103	-0.00232629	0.0153894	-0.0208901	-0.0152702
1602.72	-0.0284082	0.013876	-0.0155226	-0.0101454	0.0168229
621.322	-0.0284029	-0.0162011	0.0147746	-0.0152334	0.00488283
922.326	-0.0283812	-0.00375428	0.0154248	0.0199514	0.00627976
1472.6	-0.0283453	0.0313257	-0.010501	-0.00721564	0.016552
1944.9	-0.0283393	0.0325432	-0.0246701	-0.0100076	0.0207863
1669.79	-0.028313	-0.000486863	-0.0106593	0.0235412	0.0447464
1035.43	-0.0283014	-0.0192024	0.0072705	-0.0211478	0.0162532
1528.73	-0.0282937	-0.00254077	-0.00824604	0.00573895	0.039581
855.398	-0.0282272	-0.0201802	0.0133281	-0.0209784	-0.00225063
1734.7	-0.0282022	0.0263899	-0.014135	0.017023	0.0229483
1219.55	-0.0281938	-0.0417167	0.00715585	-0.0129608	0.0451707
1534.61	-0.0281742	0.0013793	-0.0110138	-0.023896	0.0221319
1059.53	-0.0281596	-0.0147912	0.0068884	-0.0165656	-0.00807392
1548.65	-0.0281422	0.0243893	-0.00765688	-0.00849851	0.0142555
1132.54	-0.0281377	-0.0112332	0.0320779	-0.0214638	-0.00935293
1111.55	-0.0281195	-0.00353497	-0.0112041	-0.0103077	0.0130234
1133.53	-0.0280763	0.00336968	-0.000171301	0.0269559	0.00620624
938.482	-0.0280595	0.0406445	-0.00444826	-0.0065666	0.00285332
1498.75	-0.0279061	0.028801	-0.0142183	-0.0118864	0.0154361
1543.67	-0.0278901	-0.00493345	-0.000978722	-0.00134678	0.0375756
1482.76	-0.0278797	-0.00247099	-0.00513355	-0.00222542	0.0392431
1835.72	-0.0278583	0.0262093	-0.0165992	-0.0203598	0.0213252
1966.87	-0.0277915	0.0157991	-0.0298155	0.00304862	0.0438326
1190.56	-0.0277594	0.0245101	-0.00773647	0.00128362	0.00785771
1209.55	-0.0277572	0.00727987	-0.0164835	0.00218322	0.0271221
1218.55	-0.0277357	-0.0441577	0.00824799	-0.0151102	0.0479797
1361.67	-0.0276442	0.0133171	-0.0104153	-0.0280318	0.0208517
601.345	-0.0275843	-0.0113291	0.0311205	-0.0371193	-0.0127542
557.327	-0.0275761	-0.00237469	0.0396723	-0.00667207	-0.0317267
1141.6	-0.0275131	0.0358256	-0.0016079	0.00870615	-0.00956897
1076.5	-0.0275104	-0.00325185	-0.00136276	-0.00565124	0.0118514
871.429	-0.027506	-0.0066454	0.0317399	-0.0127702	-0.0249061
850.394	-0.0275013	-0.00948516	0.0216016	-0.0175401	-0.00782581
1144.52	-0.0273842	0.0117455	0.00673058	-0.0116189	-0.00239392
1492.71	-0.0273521	0.040323	-0.0109195	0.0281906	0.0173225
1162.52	-0.0273382	-0.0444443	0.0159827	-0.00566579	0.036569
1283.64	-0.0272829	0.0375538	0.0134191	0.00736889	-0.0313525
1407.59	-0.0272446	-0.0308443	0.00223386	0.0127488	0.0443483
1126.54	-0.0272382	0.0512207	-0.000705224	0.0116263	-0.000691179
1967.88	-0.0272361	0.0144607	-0.028992	0.00644689	0.0424818
1304.63	-0.0272343	0.00782727	-0.0150728	-0.0190057	0.0232574
1415.66	-0.0271042	0.00634625	-0.00988413	-0.00635946	0.0165035
1249.56	-0.0270842	-0.00776729	0.0216991	0.00104809	0.030957
1961.83	-0.0270688	0.0268894	-0.0260253	0.00116925	0.0317927
1201.52	-0.027013	0.0454799	0.00762519	0.00884871	-0.0197879
1364.58	-0.027009	0.0435379	0.00289563	0.00089368	0.00126927
890.435	-0.0269992	-0.0255151	0.02819	-0.0440126	-0.00589704
1831.91	-0.0269912	0.0303186	-0.0209817	-0.00850786	0.0200686
1731.77	-0.0269334	-0.00373028	0.00685562	-0.0124161	0.0271411
990.384	-0.0269234	-0.0010749	0.0501894	-0.000218575	-0.00671191
1125.53	-0.026898	0.0530124	-0.00417245	0.00870186	-0.00317248
1862.81	-0.0268938	0.0261293	-0.0167774	0.0231789	0.0265833
1491.7	-0.0268711	0.0411186	-0.00917024	0.0302786	0.0178741
1779.84	-0.0268174	0.0181817	-0.0287041	-0.00263602	0.0407357
1692.81	-0.0268132	0.0282604	-0.0207262	-0.00111443	0.0228455
1099.6	-0.0267955	0.0117806	0.010844	-0.00856414	-0.0269607
1170.55	-0.0267849	-0.0109238	0.0138309	-0.0218692	0.002353
1691.66	-0.0267648	0.00587228	0.00194119	0.00699299	0.0334718
1157.52	-0.0267519	-0.000921412	0.0317535	0.0192948	0.00838268
1385.69	-0.0267393	0.0161762	-0.00135735	-0.0196476	0.00587355
1462.69	-0.0267049	-0.0171869	-0.00463229	0.00457008	0.0370942
1286.66	-0.0266902	0.0385473	-0.0153208	-0.0132674	0.000701867
1328.62	-0.0266122	-0.0211688	0.0157319	-0.0186741	0.032678
977.483	-0.0266053	0.00655593	-0.0117739	-0.0138646	0.0178143
1729.84	-0.026584	0.0158952	-0.0231954	0.00408931	0.0271471
1275.55	-0.0265067	-0.00896227	0.00218321	0.000110616	0.0212614
1174.52	-0.0264784	-0.0428042	0.0252054	-0.00149789	0.0307846
963.486	-0.0264229	-0.000894499	-0.0071407	-0.0247044	0.0214218
1280.69	-0.0263999	0.0183264	-0.0189871	-0.0149483	0.0275236
1401.66	-0.0263534	-0.00889828	-0.00693052	0.0322683	0.0338416
1173.51	-0.02634	-0.045529	0.0248511	-0.00325994	0.0348919
1087.52	-0.0263196	-0.0358525	0.0139892	-0.0206921	0.0330185
1046.55	-0.0263147	0.025945	-0.0107876	-0.0200423	-0.0010255
1402.65	-0.026309	0.00560736	-0.000534082	-0.0160612	0.00333312
2278.7	-0.0263017	0.035691	-0.0086761	0.00445046	-0.00344085
886.476	-0.0262147	-0.0180441	0.0409771	-0.0300798	-0.0152457
1204.43	-0.0262116	0.00899779	0.0244766	-0.0182684	-0.0120575
1962.84	-0.026204	0.0248239	-0.0244382	0.000788993	0.0290529
1076.55	-0.0261927	0.0239046	-0.00750198	-0.0323113	-0.00564729
1186.59	-0.026187	0.0262111	-0.00617543	-0.0260127	-0.00196315
1394.71	-0.0261528	0.0351676	-0.00886078	0.00290537	-0.00183186
1280.47	-0.0261504	-0.0431773	0.0119512	-0.0136363	0.0427712
929.49	-0.0260988	-0.00704893	0.00858224	-0.0148701	-0.0087975
1674.78	-0.0260838	0.0253888	-0.0160688	0.0125867	0.0221406
1336.66	-0.0260797	-0.0245136	-0.00479258	-0.00232181	0.039717
1284.64	-0.0260697	0.0346005	0.0147652	0.00747269	-0.0306149
938.366	-0.0260679	-0.00326911	0.0343844	-0.0214763	0.00798353
1705.84	-0.0260569	0.0242497	-0.0217222	-0.0229297	0.0198739
872.424	-0.0260545	-0.0237342	0.0251546	-0.0546905	-0.000225069
999.463	-0.0260256	-0.0152357	0.0223505	-0.0207274	0.00210989
1304.66	-0.0260169	0.0377177	-0.00781766	0.000476985	0.00476724
1203.51	-0.0260005	0.0383727	0.00950464	0.00860074	-0.015569
1735.7	-0.0259415	0.0271761	-0.0127154	0.0151909	0.0219188
1022.47	-0.025926	0.0213973	0.0133467	0.000738391	-0.00998116
1542.8	-0.0259057	0.01934	-0.0203329	-0.0155012	0.0172658
1715.77	-0.0258889	0.0289917	-0.0189095	-0.0139513	0.0178742
2018.96	-0.0258748	0.0258055	-0.0243915	0.0102385	0.0303363
1403.66	-0.0258698	0.00104868	-0.00256874	-0.0139564	0.0216882
1098.59	-0.0258677	0.0125508	0.00784816	-0.0109505	-0.0292323
669.38	-0.0258326	0.0182161	-0.014734	-0.0036205	0.0141542
2019.97	-0.0258222	0.0256439	-0.0254003	0.0086401	0.0304368
1891.84	-0.0258138	0.024975	-0.0178564	-0.00598139	0.0231887
956.447	-0.02573	-0.014482	0.000782276	0.00128636	0.0275935
1828.65	-0.0257138	0.000295294	0.00513156	-0.0187549	0.00408212
1115.56	-0.0255887	0.0189873	-0.0220553	0.00360969	0.0241456
1155.53	-0.0255453	0.0119814	-0.00897697	-0.0252779	0.0120452
1507.68	-0.0255193	0.0213363	-0.0162505	-0.0269814	0.0172412
1632.75	-0.0254984	0.0146912	-0.00979191	-0.0159703	0.0233995
1464.58	-0.0254649	-0.00393516	-0.00216099	0.0251062	0.0246163
1438.61	-0.025453	-0.00302769	0.014705	0.0245382	0.0315769
1171.55	-0.0253861	0.0354769	0.0171561	-0.0221898	-0.0142791
1573.72	-0.0253773	0.00587514	-0.00745531	0.00508728	0.0252042
1591.81	-0.025361	0.0177651	-0.0217732	-0.018574	0.032136
629.301	-0.0253392	-0.0160555	0.0533103	-0.0284773	-0.0217684
1575.73	-0.0253159	0.00321888	-0.0112311	0.0292284	0.0426968
1694.72	-0.0252941	0.0226955	-0.0218325	-0.00729238	0.028875
1075.52	-0.0252932	-0.0130513	0.0194255	0.0171375	0.000371907
1443.6	-0.02528	0.00345003	-0.0061572	-0.0132767	0.0161363
1203.59	-0.0251431	0.0119555	-0.0130224	-0.0104219	0.0140411
1202.52	-0.0250955	0.0402766	0.00883192	0.00884659	-0.0169488
1146.48	-0.0250823	-0.0454216	0.0266367	-0.0109741	0.0293848
1365.58	-0.0250667	0.040577	0.00233096	0.000360185	0.00264053
2005.85	-0.025062	0.0254598	-0.0181326	-0.0050426	0.0249931
843.434	-0.0250544	-0.02743	0.0309608	-0.0271307	0.011872
1163.52	-0.0250313	-0.0391587	0.0129441	-0.00516256	0.0323459
1772.61	-0.0250259	-0.00384124	0.00263091	-0.0320401	0.00863671
815.366	-0.0250245	-0.0280625	0.0351254	-0.0393111	-0.00364142
1412.68	-0.0249798	0.0268978	-0.014914	-0.00426977	0.0166474
1246.49	-0.0249536	-0.000305218	-0.00202712	-0.00299591	0.0231959
1892.84	-0.024939	0.0248853	-0.0162519	-0.00510716	0.0236533
1651.62	-0.0249222	-0.00593984	-0.00141456	0.0350892	0.0308073
1241.48	-0.0248862	0.0121496	-0.000942656	-0.0183728	0.00679777
1677.79	-0.0248724	0.0247052	-0.0205721	-0.0113664	0.0228967
1732.78	-0.0248516	-0.00263348	0.00396947	-0.0100858	0.0257665
1116.49	-0.0248296	-0.0268329	0.0178252	-0.0412546	-0.00203841
897.481	-0.0247893	0.00191743	0.0185749	0.00469104	-0.0333897
1224.58	-0.0247815	0.0320329	0.0202422	0.0126345	-0.0142638
1393.65	-0.0247765	0.0223143	-0.0151722	-0.0108261	0.0200732
1681.82	-0.0247657	0.0455107	-0.00218135	0.00993042	0.00228466
1287.67	-0.0247278	0.0351018	-0.0156638	-0.0124044	0.00143574
2080.55	-0.0247063	0.0215204	0.0124592	-0.0125564	-0.00979508
616.307	-0.0246853	-0.0354937	0.0376474	-0.0410166	-0.00972704
1024.4	-0.0246738	-0.00483802	-0.00265017	-0.0265463	0.0152772
1796.59	-0.0246341	0.0080456	0.010994	-0.0133837	-0.00406282
1568.6	-0.0246165	0.022019	-0.0099967	-0.0246796	0.0167393
1242.59	-0.0246152	0.0498887	0.0278205	0.0183484	-0.0282934
1467.7	-0.0245774	0.0121631	-0.0144668	-0.0077173	0.0214223
2285.1	-0.0245694	-0.00196736	-0.0201709	0.0115548	0.0507883
911.435	-0.0245319	0.00738053	0.0166725	0.00803099	0.00507934
1693.82	-0.0245242	0.0272615	-0.0224312	-0.000634645	0.0224967
1243.59	-0.0245074	0.0479656	0.0296733	0.0205545	-0.0262623
1398.59	-0.0244964	0.00485226	-0.0157611	0.0124955	0.0277188
736.284	-0.0244877	-0.00290755	0.0157425	-0.0155032	0.000732659
1118.53	-0.0244425	-0.0257073	0.0179646	-0.0138433	0.0254484
853.402	-0.0244044	0.00237706	0.00271639	-0.0147409	0.000717272
1138.42	-0.0243689	-0.00661692	0.00608517	-0.010429	0.00575416
1802.54	-0.024365	0.00911815	0.00558495	-0.0313817	0.00654254
1448.61	-0.0243185	-0.00160083	0.00151791	0.00835859	0.0425948
1117.53	-0.0243128	-0.0366384	0.0285486	-0.00844646	0.0289408
992.381	-0.0242719	-0.00208255	0.0424906	0.000368333	-0.00200524
959.366	-0.0242692	0.00264093	0.0534733	-0.0157593	-0.0246
898.484	-0.0242148	1.80578e-05	0.0210119	0.006898	-0.0293696
1767.92	-0.0241886	0.0430522	-0.0234362	-0.000179115	0.0136303
1661.73	-0.0241271	0.00393273	-0.0213146	0.00160164	0.0314597
589.306	-0.024104	-0.0235177	0.0464626	-0.0277609	-0.017708
887.479	-0.0240992	-0.0148908	0.0354914	-0.0228186	-0.0104655
1603.72	-0.0240733	0.0130769	-0.014734	-0.0092937	0.0138871
827.403	-0.0240724	-0.0386614	0.0413664	0.00836751	0.0305559
1184.57	-0.0240521	-0.00226775	0.00144003	-0.0228855	0.00465887
1397.72	-0.0240481	0.0375195	-0.00446256	-0.0127675	6.56892e-05
1716.77	-0.02402	0.0277739	-0.0189243	-0.0137263	0.0166997
1331.56	-0.0239915	0.0109183	0.0036453	0.0222936	0.00758679
1127.54	-0.0239757	0.0374623	0.00469394	0.00576252	-0.00347365
571.296	-0.0239747	-0.0202764	0.0386124	-0.0181368	-0.00843811
1730.85	-0.0239655	0.0165544	-0.0231527	0.00276605	0.0255842
1408.6	-0.0239418	-0.0263082	0.000503301	0.0121839	0.0397888
1818.79	-0.0239166	0.00853078	-0.0113287	0.025959	0.036585
1682.83	-0.0238961	0.0442811	-0.00258673	0.0104201	0.000710223
1206.57	-0.0238741	0.00652208	-0.00899391	-0.0308385	0.0132737
1423.59	-0.0238541	0.00550129	-0.00637447	-0.0209132	0.0106208
1057.45	-0.0238512	0.00187505	0.000846324	-0.0267715	0.0123809
1150.51	-0.0238423	0.00805226	0.0186293	-0.00766491	0.0145242
576.277	-0.0238363	-0.0214258	0.0524127	-0.0321628	-0.0333135
1437.6	-0.0238078	0.00870306	0.0236878	-0.0135622	0.0115245
1016.49	-0.0237889	0.00682566	-0.00206581	-0.0330304	0.0148669
2080.85	-0.023777	0.029481	-0.0249089	0.00723285	0.0232396
1162.58	-0.0237563	0.00105333	-0.000758156	0.00370764	0.0297795
1362.67	-0.023743	0.0110356	-0.0131784	-0.0317256	0.0197718
1590.71	-0.023735	-0.00154804	-0.00725858	0.0330248	0.0259992
1184.61	-0.0237221	-0.000939971	-0.010416	-0.0330054	0.0193332
1768.92	-0.0237089	0.0425897	-0.0226104	-0.000615327	0.0153501
1170.58	-0.0236932	-0.0215875	0.0088272	-0.0114231	0.0181617
1158.53	-0.023671	8.08969e-06	0.0226314	0.016753	0.00716015
1146.56	-0.0236684	0.00465353	0.018586	-0.0127849	-0.0114388
1670.8	-0.0236605	-0.00271997	-0.010314	0.0241855	0.0422058
2081.86	-0.0236193	0.0292826	-0.0252778	0.00611021	0.0234122
1888.65	-0.0235872	0.00459607	0.000477609	-0.0123615	0.00181315
1688.53	-0.0235798	-0.00309243	0.0347823	-0.013024	-0.00631687
1281.48	-0.0235597	-0.0386708	0.00905891	-0.0109037	0.0388054
687.356	-0.0235477	-0.0367604	0.0205856	-0.0485262	0.00352017
1202.58	-0.0235337	-0.0021508	0.019192	-0.0213838	-0.00627552
1475.7	-0.0235176	0.0329147	-0.0157231	0.00660994	0.00586886
861.424	-0.0234804	0.0324052	0.0157522	-0.0044504	-0.0240502
1222.48	-0.023467	-0.0140893	-0.00271656	0.00187515	0.0197581
1535.61	-0.0234622	0.00262238	-0.0114077	-0.0231995	0.0191159
991.387	-0.0234544	-0.000467423	0.0401648	-0.000933701	-0.00317174
1864.82	-0.0234415	0.0251373	-0.0238665	0.00428717	0.0272621
1146.52	-0.0234398	-0.0512948	0.024534	-0.0195299	0.0316568
1602.78	-0.0234359	0.0126036	-0.0158955	-0.00795546	0.0185887
1708.87	-0.0234347	0.0362901	-0.0246871	-0.0117821	0.018064
1841.76	-0.0233966	0.0118604	-0.0218921	-0.000353089	0.0340059
1234.6	-0.0233851	-0.00327448	0.00579818	0.0046617	0.0321954
1465.59	-0.0233785	-0.00315901	-0.00108436	0.0208943	0.0243402
1282.47	-0.0233355	-0.0376672	0.00956828	-0.00871878	0.0376407
1174.47	-0.0233094	-0.0172566	0.0103952	-0.0333717	0.00358175
844.437	-0.0232513	-0.0203704	0.0266393	-0.0244421	0.00645995
887.387	-0.0232229	-0.0153522	0.0562977	-0.0306142	-0.0369578
1220.55	-0.0232039	-0.0320219	0.00560429	-0.0133764	0.0347221
1265.63	-0.0232039	0.0111367	-0.000629806	0.00830063	0.00121965
675.307	-0.0231792	-0.0193813	0.0376465	-0.0324258	-0.0165594
2095.96	-0.023177	0.0222724	-0.0227785	-0.0169327	0.0215692
1049.44	-0.0231708	-0.000758741	-0.00226404	0.0185851	0.0130519
604.321	-0.0231665	-0.0444476	0.0204372	0.0116063	0.0297932
941.447	-0.0231655	0.0508054	0.0185597	0.0183411	-0.00449348
1780.5	-0.0231449	-0.0407367	0.0273266	-0.00603184	0.0279431
1388.7	-0.0231318	0.00496793	-0.00676658	0.00614167	0.036619
976.455	-0.0230957	9.54442e-05	0.00319968	-0.0179229	0.00445826
845.45	-0.0230473	-0.0318768	0.0135897	-0.021784	-0.00487316
1695.73	-0.0230302	0.0217393	-0.0204761	-0.00882774	0.0251569
1257.58	-0.0230256	0.0462503	0.0324113	0.0181829	-0.0340526
858.444	-0.0230183	-0.0402014	0.022732	-0.0167895	0.0196775
1645.8	-0.0229898	-0.00766357	-0.00266221	-0.020625	0.038326
547.3	-0.0229508	-0.0287429	0.0176885	-0.00910751	0.0231278
2004.84	-0.022924	0.0227179	-0.0156796	-0.00264843	0.0272649
1271.47	-0.0229012	0.00349025	-0.0137001	0.00370473	0.0234265
2029.82	-0.0228902	0.01292	-0.0234788	0.00529067	0.0388418
1116.57	-0.0228391	0.0161834	-0.0187557	2.4306e-05	0.0205035
1168.61	-0.022834	0.0291534	-0.00062434	-0.00744314	-0.00487788
1486.74	-0.0228289	0.0247289	-0.0146974	-0.0105135	0.0119828
1692.67	-0.0228276	0.0062689	-0.00122893	0.00702237	0.0291545
828.405	-0.0228206	-0.0345569	0.0426021	0.00869513	0.0237587
1775.8	-0.0228166	0.0277276	-0.0221667	-0.0158714	0.0182093
2284.1	-0.0227844	-0.00323285	-0.0208834	0.00901891	0.0476717
1191.56	-0.0227754	0.0217692	-0.0100462	0.00339954	0.00681811
2064.54	-0.0227405	-0.0139805	0.0118279	-0.029916	0.00237116
1139.41	-0.0227072	-0.00526596	0.00505029	-0.00918165	0.00411023
875.388	-0.0226714	0.002616	0.0598898	-0.0268949	-0.0416689
1395.71	-0.0226525	0.0325492	-0.0121647	-0.000953719	-0.00135582
1847.8	-0.0226501	0.0181425	-0.0235366	0.0025272	0.0263822
946.501	-0.0226424	0.00306327	0.00522252	-0.00616113	-0.00204669
969.477	-0.0226402	0.00183629	-0.00211528	-0.0153445	0.00794201
845.405	-0.0226267	0.0027098	0.0380059	-0.00509184	-0.0156207
617.31	-0.0226195	-0.0295984	0.0318317	-0.0312759	-0.00516854
1100.6	-0.02258	0.00914041	0.00530973	-0.00806673	-0.0204338
2209.01	-0.0225554	0.0245435	-0.0241545	0.0148241	0.0301562
2484.59	-0.0225322	0.0395474	0.02079	0.0129893	-0.0162114
1258.59	-0.0225142	0.0432884	0.0318063	0.0202708	-0.0315531
2131.93	-0.0225062	0.0288763	-0.0276018	0.00725177	0.0275135
1147.48	-0.022447	-0.0386699	0.0215584	-0.00902029	0.0246807
1335.46	-0.0224431	-0.0170243	0.0159719	0.0074026	0.0190272
1328.64	-0.0223689	0.0382463	-0.00412029	0.0417205	-0.00442956
1195.62	-0.0223565	0.0402821	-0.00879208	0.00188582	-0.0151376
1819.79	-0.0223516	0.00884582	-0.00995628	0.0251397	0.0338236
2002.65	-0.0223368	0.0236753	-0.00468466	-0.0255999	0.000162465
1342.55	-0.0223345	0.00358017	-7.56956e-05	-0.0160492	0.00651384
1659.77	-0.022334	0.0148661	-0.0206647	-0.00736506	0.0219571
979.406	-0.0223302	-0.0043218	0.0197073	-0.0149962	-0.00479812
1437.65	-0.0223246	0.0515389	0.00123788	0.00615506	-0.00631276
1244.59	-0.0222908	0.0392457	0.0253989	0.0172436	-0.0206237
1505.71	-0.0222747	0.0282288	-0.00339735	0.00148431	0.0189234
890.399	-0.0222691	-0.0466868	0.0397883	-0.0110525	0.0259828
1277.54	-0.0222688	-0.00633455	0.00227095	-0.0010452	0.019809
645.297	-0.022256	-0.029904	0.0504297	-0.0352103	-0.019807
1198.64	-0.0222234	0.0127064	-0.00923554	-0.0127464	0.00500649
1195.46	-0.0222206	0.000229571	0.00712605	0.0163268	-0.00151015
1812.89	-0.0222074	0.0293972	-0.0201947	0.00545182	0.0226104
1774.48	-0.0221792	-0.0128329	0.0330758	-0.0197707	-0.0164509
1204.52	-0.0221573	0.0193895	0.0233603	0.00121512	-0.0152959
891.401	-0.022145	-0.0446075	0.0414927	-0.00846786	0.0216856
1084.64	-0.0221449	0.0232612	0.0133402	0.00798581	-0.0318117
1550.71	-0.0221353	0.0118654	-0.0180996	-0.0141122	0.0278218
1342.61	-0.0221151	0.00781131	-0.00873813	-0.018027	0.0227556
1003.51	-0.0221	0.0102919	-0.0123522	-0.0204693	0.00679109
1473.6	-0.0220922	0.0265748	-0.0117496	-0.00604151	0.0137501
916.49	-0.0220825	-0.00265035	0.00670214	-0.0111651	-0.00209017
855.434	-0.0220478	-0.0120314	0.0127433	-0.00736705	-0.0132946
2096.97	-0.0220441	0.0182401	-0.0200573	-0.0177694	0.0214092
939.485	-0.0220436	0.0359584	-0.0087931	-0.00758518	0.00405375
1304.59	-0.0220275	0.0123357	0.018466	0.0244026	-0.00576738
1267.49	-0.0219912	0.00281189	-0.00515762	-0.0271482	0.0136602
1352.66	-0.0219774	-0.0309844	0.000691202	-0.00316482	0.0365219
1106.53	-0.0219723	-0.00254211	-0.00704989	-0.00958538	0.00779166
1670.78	-0.0219648	0.0270421	-0.0152327	-0.0211219	0.0095679
1893.84	-0.0219499	0.0208254	-0.0164311	-0.00724638	0.018971
1438.71	-0.0219323	0.0531682	-0.00408861	0.0183913	-0.000756713
1652.62	-0.0219184	-0.00685498	-0.00266012	0.0341502	0.0280806
1863.81	-0.0219137	0.0229527	-0.018841	0.0166542	0.0226232
1544.67	-0.0219105	-0.00756395	-0.0016922	-0.00144782	0.0312692
1101.53	-0.0219096	-0.0226642	0.0109478	-0.00013429	0.0219441
1250.57	-0.0219053	-0.00758198	0.0144412	-0.00380588	0.0274692
1576.73	-0.0218748	0.00512937	-0.0129621	0.0275171	0.0402874
1073.53	-0.0218406	-0.0280887	0.00394461	0.0071269	0.037703
958.481	-0.0218134	-0.00900202	0.00866102	-0.0277131	0.00426594
1712.63	-0.0217947	0.0133623	-0.0157322	-0.0234627	0.0223557
670.329	-0.0217708	-0.0143571	0.00647932	-0.0179062	0.00720819
1329.63	-0.0217486	-0.0276179	0.0117973	-0.00847454	0.0291293
1894.84	-0.0217362	0.0241863	-0.0175444	-0.00747384	0.0184085
1836.72	-0.0217308	0.0215753	-0.015181	-0.0171213	0.0151358
1147.52	-0.0217221	-0.05103	0.0236513	-0.0166701	0.0299766
1521.68	-0.0217137	0.0274879	0.00616539	0.00351041	0.012345
874.325	-0.0217098	0.00616166	0.0404431	-0.0139894	-0.0136861
2132.94	-0.0216975	0.0305875	-0.0264207	0.00691356	0.0262792
827.439	-0.0216974	0.0220339	0.0427822	0.0009123	-0.0262188
845.428	-0.0216545	-0.0127954	0.00424312	0.0216561	0.0271869
1467.71	-0.0216484	0.0223419	-0.0140448	-0.00374993	0.00991349
1842.76	-0.0216167	0.0135986	-0.0225129	-0.00172512	0.0339993
829.418	-0.0216166	-0.0350003	0.0380352	-0.0138773	-0.00330923
1331.63	-0.0216095	-0.00784607	-6.25672e-06	-0.0189128	0.0253507
1009.42	-0.0215952	0.00166238	0.0122409	-0.00786823	-0.00588881
1646.8	-0.0215812	-0.00675276	-0.00312286	-0.0203542	0.036023
1750.49	-0.0215177	-0.0001383	0.0468878	-0.020211	-0.020825
1521.79	-0.0215174	0.0376814	-0.00994243	0.0126849	0.0155132
1736.7	-0.0215165	0.0200011	-0.0132336	0.0122743	0.0174804
1782.57	-0.0214931	0.00639422	0.00557683	-0.0154512	0.00355502
561.302	-0.0214882	-0.0468733	0.0407464	-0.00962808	0.0169952
1627.75	-0.0214479	0.0328879	-0.0115973	0.010719	0.0132809
1077.55	-0.0214465	0.0215516	-0.00940206	-0.0276621	-0.0056011
1416.67	-0.0214428	0.00619999	-0.0102101	-0.00642239	0.0130495
1439.61	-0.0214407	-0.00390644	0.0116497	0.0214723	0.0281404
1530.73	-0.021422	0.00754978	-0.00211896	0.0094902	0.0291328
1156.51	-0.0214096	-0.0258929	0.00827108	-0.00425955	0.0196834
1422.63	-0.0214005	0.0103195	0.0117264	-0.0160725	0.00984706
1713.64	-0.0213981	0.00520497	-0.0124113	-0.0121088	0.0251983
893.442	-0.02139	0.00390593	0.00403626	-0.00923724	0.00133576
2164.83	-0.0213646	0.0198306	0.0121341	0.00260996	-0.0250949
646.3	-0.0213398	-0.0228129	0.0472193	-0.0224105	-0.015404
1155.6	-0.0213319	0.0121085	0.00110832	-0.0310556	0.0050998
1737.71	-0.0212869	0.0253641	-0.0166268	-0.00889238	0.0146574
813.387	-0.0212863	-0.00430382	0.0248716	-0.0225805	-0.00379932
1272.47	-0.0212596	0.00233107	-0.00785349	0.00113531	0.0197272
961.365	-0.0212572	0.00336385	0.0409795	-0.0120451	-0.0167571
1000.41	-0.02125	0.0353073	-0.00160454	-0.0101571	-0.00220531
1662.73	-0.0212499	0.00619209	-0.0211086	-9.08125e-05	0.0282856
958.461	-0.0212496	-0.0118519	0.00426021	0.00641428	0.0213964
2028.82	-0.0212303	0.0135647	-0.0209944	0.00577759	0.0383754
2208.01	-0.0212184	0.0234885	-0.0255883	0.00991574	0.0261429
1924.89	-0.0212166	0.0201365	-0.0164163	-0.00854306	0.0192774
1463.73	-0.0211985	0.00119541	-0.0113318	0.00710605	0.0349694
882.481	-0.0211752	-0.0165586	0.00575236	0.00575814	0.0218952
1366.58	-0.02117	0.0339779	0.000358552	0.000682277	0.00373896
749.277	-0.0211389	-0.0369904	0.0244889	-0.0469661	0.00146739
1956.95	-0.0211381	0.0409747	-0.0276507	0.0169147	0.021054
1718.68	-0.0211363	0.0165887	-0.0111151	-0.0157685	0.0119172
1003.52	-0.0211218	0.019206	0.00121714	-0.0226444	-0.0041576
888.391	-0.021091	-0.0136554	0.0534348	-0.0230295	-0.03602
972.517	-0.021035	-0.0266865	0.00997219	-0.0101589	0.0161375
1398.7	-0.0210305	0.0201966	-0.00757623	-0.0185592	0.00356209
1102.4	-0.0210126	0.0196325	0.0303729	-0.00921966	-0.0211158
1612.72	-0.0210045	-0.0031561	-0.0055902	0.00630988	0.0307086
1693.66	-0.0209734	0.0070209	-0.00387359	-0.00211546	0.0208578
1117.59	-0.0209577	0.0367119	-0.016958	-0.0029607	0.0063122
1396.66	-0.020952	-0.00333825	-0.00287825	0.00226464	0.0280624
1925.89	-0.0209384	0.0173524	-0.016895	-0.0140861	0.0188276
1248.57	-0.0209289	-0.0150343	0.0035569	-0.018057	0.0339372
901.496	-0.0208894	-0.0108344	0.0199517	-0.0130122	-0.00949898
1013.47	-0.020883	-0.0109947	-0.00353228	0.000596132	0.026462
861.407	-0.0208705	-0.0137046	-0.00329234	0.010358	-0.00084141
1288.53	-0.0208587	0.00498547	0.000325417	-0.0218845	0.00128783
844.429	-0.0208577	-0.0419231	0.0230637	-0.0265606	0.024758
961.447	-0.0208546	-0.0421963	0.0131252	-0.0125924	0.0325727
1493.71	-0.0208303	0.0350165	-0.012705	0.0224126	0.0123743
1957.96	-0.0207864	0.0413134	-0.0271483	0.0158674	0.0228525
1553.63	-0.0207769	0.0376093	-0.00534532	0.0266592	0.0114775
2020.97	-0.0207671	0.0247885	-0.0225032	0.00808212	0.0275912
1088.52	-0.0207047	-0.0306268	0.0105997	-0.0176012	0.0265581
828.442	-0.020696	0.0192071	0.0437381	0.00490962	-0.0251815
1492.57	-0.020689	-0.00958752	0.00808251	-0.0101376	0.0284906
876.39	-0.0206643	0.00188346	0.0577277	-0.0223611	-0.039557
1390.56	-0.0206352	0.0322816	0.00578677	0.0347726	-0.00428239
1164.49	-0.020623	0.0198075	0.0230211	-0.00570604	0.0108403
1709.87	-0.0206023	0.0347257	-0.0238618	-0.0107274	0.0165804
2034.56	-0.0205918	-0.00838758	0.0175197	-0.0316913	-0.00257668
1066.44	-0.0205881	0.0182408	0.00223554	-0.0197311	-0.0065981
816.369	-0.0204925	-0.0215377	0.0283228	-0.0283603	-7.17729e-05
1439.71	-0.0204807	0.0508958	-0.00274293	0.0170219	-0.000841388
1095.4	-0.0204788	-0.0049951	0.0138159	-0.0290624	-0.0054634
1335.56	-0.0204562	-0.0422935	0.0125149	0.01214	0.030233
870.409	-0.0204535	0.0410067	0.0447374	0.0167847	-0.0361799
1083.64	-0.0204267	0.024691	0.00956773	0.00570242	-0.0356136
1172.55	-0.020381	0.0329051	0.0119678	-0.0195353	-0.0110123
798.433	-0.0203736	0.0241319	0.0437139	0.0215188	-0.0386638
1837.72	-0.0203624	0.0228608	-0.0165695	-0.0167973	0.015642
951.375	-0.0203573	-0.00785808	0.0130058	-0.0271427	-0.00078999
942.449	-0.0203434	0.0476473	0.0170935	0.0173782	-0.00450746
1223.47	-0.0203394	-0.0117728	-0.00336171	0.000940114	0.0187022
1233.47	-0.0202834	0.031188	0.0207165	-0.0215155	-0.0135988
1820.79	-0.0202809	0.0113604	-0.0128441	0.00945147	0.0276967
1671.78	-0.0202583	0.0242276	-0.0157106	-0.0163133	0.0109463
1114.53	-0.0202564	-0.0501077	0.0170462	-0.0164186	0.0298645
602.348	-0.0202546	-0.00618749	0.0215276	-0.0254036	-0.00662626
1096.54	-0.0202524	0.0171293	0.00136848	-0.00366841	-0.00533106
883.448	-0.0202371	0.0103469	-0.00516658	-0.00431782	0.00100298
577.279	-0.0202229	-0.0177892	0.0465639	-0.0240594	-0.027355
801.387	-0.02021	-0.048165	0.0367651	-0.00365606	0.0242378
774.424	-0.020208	-0.00403933	0.0510892	-0.0312156	-0.0163472
1205.43	-0.0201535	0.00869261	0.0195266	-0.0149182	-0.00986436
1449.61	-0.0201215	-0.00134223	-0.000806755	0.00629088	0.0370369
1134.54	-0.0201076	0.00473296	-0.00320241	0.016921	0.00588716
1654.54	-0.0200888	-0.0293801	0.0202785	0.0102975	0.0293264
1082.63	-0.0200741	0.0248484	0.00787306	0.00392088	-0.03631
1450.61	-0.0200466	0.00171094	0.00160806	0.010549	0.0334291
1187.45	-0.0199798	0.042992	0.0141877	0.00759978	-0.0091731
1865.82	-0.0199772	0.0238702	-0.0243563	0.000753851	0.0258974
2250.58	-0.01997	0.0413608	-0.0125074	0.00398898	0.00341553
1044.49	-0.0199697	-0.00512039	0.00258674	-0.014609	0.000801198
571.341	-0.0199329	-0.0154809	0.015711	-0.01164	0.00210537
802.391	-0.0199297	-0.0410697	0.0302652	-0.00414219	0.0226365
905.399	-0.0199215	-0.0504772	0.039064	-0.0147743	0.020711
924.323	-0.0199034	-0.00276836	0.00797396	0.013759	0.00635255
2437.05	-0.0198922	0.0383963	-0.0269225	-0.00520427	0.016491
1574.73	-0.0198838	0.00638323	-0.00917774	0.00409343	0.0198317
1612.7	-0.0198813	0.00239486	-0.0027332	-0.000309883	0.0287566
1459.51	-0.0198624	0.00299761	-0.0126798	0.0126293	0.0261261
630.305	-0.0198598	-0.00979769	0.0383379	-0.0179436	-0.0113747
1237.47	-0.0198592	-0.00127265	0.000833204	-0.0155764	0.000282935
1258.61	-0.0198212	-0.0049959	0.00265	-0.0359251	0.0115251
1963.84	-0.0198165	0.0224968	-0.0237454	-0.00124475	0.0230119
1661.79	-0.0198015	-0.015534	-0.00961186	0.00203189	0.0316573
1090.47	-0.0197484	-0.000232749	-0.00488003	0.00535994	0.0111341
1397.69	-0.0197364	0.000554201	-0.00676895	-0.00396406	0.0272843
856.402	-0.0197328	-0.011577	0.00417019	-0.0141037	-0.000929062
1341.6	-0.0197025	0.000669255	0.0100057	-0.0167327	0.0183148
1329.64	-0.0196977	0.0364576	-0.00378841	0.0342063	-0.00317969
1337.46	-0.0196891	-0.00997131	0.0119632	-0.00649474	0.0154191
1463.57	-0.0196539	0.00307241	0.00870752	-0.0195449	-0.00185592
1468.7	-0.0196434	0.0134535	-0.0148427	-0.00814672	0.0181482
1460.71	-0.0196278	0.0372455	-0.00548001	-0.00244685	-0.00946071
797.428	-0.0196263	0.0266621	0.0483983	0.0212393	-0.0445417
1402.66	-0.0196245	-0.00663851	-0.00990513	0.024718	0.0239099
1360.59	-0.0196025	0.0314087	0.00920036	0.00944474	-0.00277644
1529.73	-0.0195817	0.000231669	-0.0074327	0.0110253	0.0297143
1569.59	-0.0195451	0.0190735	-0.0111233	-0.0215912	0.0127951
1816.8	-0.0195244	0.020245	-0.0184727	0.00500423	0.0243459
1191.46	-0.0195209	0.00336245	0.015547	-0.0182578	-0.00838393
830.422	-0.0195066	-0.0267339	0.0290482	-0.0105728	5.38835e-05
815.414	-0.0194935	0.0085118	0.02748	-0.00695196	-0.0109875
2438.05	-0.0194934	0.0381729	-0.0257171	-0.00317216	0.0170858
586.334	-0.0194922	-0.0378271	0.0462298	-0.00112456	-0.00521687
1348.59	-0.0194819	0.0255217	-0.00330141	-0.00143656	0.00103453
602.292	-0.0194687	-0.03007	0.0599207	-0.0298594	-0.019751
953.355	-0.0194512	0.000422834	0.022284	-0.0153917	-0.00386661
1206.43	-0.0194418	0.00777545	0.0176032	-0.014802	-0.00853631
1249.57	-0.01944	-0.0099482	0.000144619	-0.0134366	0.030298
873.427	-0.0194339	-0.0102802	0.0205483	-0.0452115	-0.00498184
906.402	-0.0194142	-0.047489	0.0408035	-0.0117191	0.0167989
2023.78	-0.0194098	0.0210088	-0.0190292	0.00036498	0.028192
1559.67	-0.0193894	0.0223812	-0.0105422	-0.0124825	0.0093422
1112.53	-0.0193741	-0.00171318	0.0148909	-0.0124208	-0.0175275
1117.56	-0.0193548	0.0136138	0.0174752	-0.0070439	-0.0132881
1097.57	-0.0193517	0.0291272	-0.00800553	0.00269839	-0.00650884
1098.52	-0.0193362	-0.0164294	0.00341907	-0.00728546	0.00318222
965.343	-0.019336	-0.00230529	0.0125249	-0.0221082	-0.00298264
1813.89	-0.0193132	0.0274087	-0.0189658	0.0038817	0.0206212
1229.52	-0.0192999	0.0148883	0.00783486	0.0264259	-0.00541958
1522.8	-0.0192802	0.0369678	-0.0138775	0.00993915	0.0137777
1431.64	-0.0192192	-0.0178971	0.00308605	-0.0137845	0.0314054
1011.49	-0.0191906	0.0240606	-0.00939022	-0.00408358	-0.00491507
1945.9	-0.0191814	0.0281123	-0.0240385	-0.0111564	0.0170909
1042.48	-0.0191761	0.018357	0.0128131	-0.00973333	-0.0173243
1438.65	-0.0191728	0.0480491	0.00127769	0.00617612	-0.00686724
1710.83	-0.0191692	0.035549	-0.017191	0.0317157	0.0185796
1332.56	-0.0191581	0.00974963	-0.00055053	0.0157014	0.00844418
673.329	-0.0191427	-0.0323172	0.0247568	-0.0126386	0.0118949
688.358	-0.0191304	-0.0254908	0.0159735	-0.0321707	0.00387692
1590.65	-0.019106	0.000800139	-0.00631359	0.00351573	0.0314915
996.488	-0.019074	0.015107	-0.000805806	-0.0036459	-0.00193192
2286.1	-0.0190273	0.00540228	-0.0170887	0.0141068	0.039232
1129.56	-0.0190158	0.00712947	0.0132817	-0.0102135	-0.00166818
1117.51	-0.01901	-0.0196798	0.00585519	0.0290473	0.0289013
1359.67	-0.0189921	0.0420476	0.0124675	0.0261269	0.00337941
2024.78	-0.01895	0.0205179	-0.0178189	0.00105765	0.0266022
960.369	-0.0189378	0.00260435	0.0409422	-0.0115882	-0.0180591
1016.42	-0.0188696	0.0171789	0.0190645	-0.0138334	-0.0220356
751.276	-0.0188389	-0.0285629	0.0178907	-0.0336704	0.00229792
1112.57	-0.0188357	0.0215048	0.00797959	0.00835531	-0.0210899
1094.39	-0.0188291	-0.0171598	0.0237065	-0.0305297	-0.008848
1522.68	-0.0188281	0.0220296	0.000824525	-0.00140664	0.0117513
728.335	-0.0188144	-0.000236578	0.00247511	-0.0145974	0.00212127
1116.51	-0.0188079	0.0276281	0.0153617	0.00454818	-0.00812051
603.287	-0.0188058	-0.0230186	0.0249807	-0.0341061	-0.00923271
1213.61	-0.0187949	-0.00158544	-0.00289971	0.000967672	0.0165664
1624.56	-0.0187158	0.00802595	0.0123111	-0.0130599	-0.00524439
1522.61	-0.0187113	-0.0212979	0.00291471	0.00174214	0.0286434
854.413	-0.0187056	0.0105888	-0.00310504	-0.0105749	0.00202829
1391.57	-0.0186858	0.0299376	-0.000468633	0.0283195	-0.00250346
1177.47	-0.0186709	0.0141546	0.0390633	-0.00986135	-0.0221905
1318.65	-0.0186703	-0.00946506	-0.00688424	0.000865832	0.0285851
1000.53	-0.0186534	0.0209596	0.00479553	-0.019642	-0.0197345
1554.63	-0.0186378	0.0350703	-0.00653139	0.0231703	0.0107727
1208.44	-0.0186104	-0.0436071	0.0265185	-0.0171295	0.0205342
645.333	-0.0186032	-0.0285581	0.0278523	-0.0281847	-0.00546755
871.393	-0.0185914	-0.0175455	0.0155488	-0.0390952	0.00408365
871.413	-0.0185764	0.0363651	0.0416134	0.01778	-0.0331886
1331.61	-0.0185718	-0.00757116	0.00973813	-0.00141048	0.0220467
1738.72	-0.0185683	0.0221922	-0.0174179	-0.0111845	0.0115908
618.243	-0.0185639	-0.00838557	0.0533231	-0.0112091	-0.0363542
901.404	-0.0185483	-0.0229422	0.011548	-0.0504585	0.00293903
1639.74	-0.0185252	0.0186786	-0.0154053	-0.0135298	0.0144252
1641.73	-0.0185091	-0.025171	0.00364263	-0.0181243	0.0335061
2157.97	-0.0184942	-0.00143027	-0.0121558	-0.0053097	0.0363978
2082.86	-0.0184923	0.0250079	-0.0222271	0.00547748	0.0198823
889.488	-0.0184531	-0.00927508	0.0197837	-0.0199503	-0.00612165
2196.73	-0.0184515	0.010184	-0.00169781	-0.0108178	-0.0156325
1285.63	-0.0183974	0.0334145	-0.015018	0.00967813	0.0108765
884.425	-0.0183969	0.0491152	0.0292389	0.0237567	-0.0296932
1520.67	-0.0183943	-0.0171632	-0.00158552	-0.0125505	0.0392175
954.465	-0.0183829	0.02619	-0.00664417	-0.00226971	-0.00890142
1476.71	-0.0183444	0.0301707	-0.0185053	0.0045541	0.00677133
1536.61	-0.0183139	0.00291808	-0.00875962	-0.0145908	0.0150854
1287.63	-0.0183065	0.00542169	-0.00185357	0.0180844	-0.00716989
862.426	-0.0182777	0.0264105	0.0104741	-0.00465531	-0.0181513
1441.71	-0.0182512	0.018905	-0.0111468	-0.0018993	0.0110903
1469.52	-0.0182382	-0.0319406	0.00353003	0.0109921	0.0379627
1604.77	-0.0182314	-0.0133951	-0.00528427	0.00262875	0.0303293
1311.48	-0.0182079	-0.00498054	0.0258374	0.00205374	0.0239683
1285.64	-0.0181679	0.0234923	0.00942401	0.00481842	-0.0246045
833.377	-0.0181356	-0.0208175	0.0164884	-0.0254626	0.000162063
1431.63	-0.0181293	0.0311573	0.0171622	0.0292826	-0.00642319
1175.52	-0.018076	-0.0330754	0.0162147	-0.0012763	0.0246356
906.43	-0.0180759	-0.0429396	0.0302003	-0.0380368	0.00239176
1810.49	-0.0180683	-0.0423653	0.0240369	-0.00738113	0.0253622
1369.67	-0.0180679	-0.00147726	-0.00977697	0.00976914	0.0302814
1122.57	-0.0180642	0.027251	-0.00462346	0.0219665	-0.00217661
2006.84	-0.0180624	0.0208489	-0.0158481	-0.00809334	0.0127196
889.325	-0.0179664	-0.0337234	0.0470946	0.0036969	0.0154673
1711.83	-0.0178904	0.0324117	-0.0172792	0.0275238	0.0180795
1529.71	-0.0178892	-0.0167532	0.00264797	-0.0191263	0.0349221
1923.73	-0.0178851	0.0199895	-0.012348	0.0149984	0.0176619
1008.46	-0.0178711	-0.0110922	0.02101	-0.0152038	0.0139988
859.392	-0.0178144	-0.0229399	0.033545	-0.0260636	-0.0131309
810.47	-0.0177918	0.0413958	0.0287031	0.0291113	-0.0406392
2194.89	-0.0177751	0.0217862	-0.0214147	0.00534911	0.0243119
1145.52	-0.0177336	-0.00296586	0.0121478	0.00146307	0.00977966
1180.55	-0.0177271	0.0167189	-0.00106871	-0.0292486	-0.00283163
1360.67	-0.0177206	0.0381989	0.0107753	0.0241959	0.00400988
1683.83	-0.0177171	0.0364973	-0.00491786	0.00972617	-0.00252923
905.32	-0.0177111	-0.0036102	0.0696697	-0.0176142	-0.0293253
818.378	-0.017704	-0.0356372	0.0151816	-0.0261638	0.00691699
2210.01	-0.0176802	0.0220411	-0.0243133	0.00985111	0.0245039
1171.58	-0.017659	-0.0178731	0.00662333	-0.0114101	0.0171565
1432.7	-0.0176353	0.0367519	-0.0114236	-0.0068576	-0.00297229
912.419	-0.0176344	0.0230729	0.0315099	0.00927408	-0.0129292
2007.84	-0.0176295	0.017516	-0.0155023	-0.00163282	0.0199137
822.388	-0.0175993	-0.0271588	0.0128088	-0.010538	0.0230358
898.512	-0.017592	0.000765191	0.0266536	0.0114919	-0.0452578
923.405	-0.0175896	0.00672353	0.0133902	-0.0149209	0.0072916
1689.68	-0.0175725	0.0268589	-0.00840507	0.00812881	0.0132312
1356.65	-0.0175468	0.00858196	-0.00307572	-0.0182283	0.00520158
1264.54	-0.0175374	-0.00593698	-0.00477626	0.00903054	0.0107193
2426.69	-0.0175311	-0.0018804	-0.00722406	0.00114683	0.0285809
1653.62	-0.0175269	-0.00545969	-0.00551996	0.0260407	0.0227225
1322.58	-0.0175249	0.00334146	-0.00215206	0.0199451	0.00628981
1152.43	-0.0175195	-0.0122734	0.0325715	-0.0248116	-0.0187915
870.482	-0.0174919	0.00157569	0.00510822	-0.0121405	-0.0189728
587.337	-0.0173863	-0.029662	0.0416129	-0.000290861	-0.00327607
885.428	-0.0173684	0.0450351	0.0289971	0.0236174	-0.0260785
883.44	-0.0173345	0.0224535	0.00182067	-0.0132564	-0.00721746
1368.65	-0.0172921	0.00804704	-0.00508388	-0.00675683	0.0171138
1368.61	-0.0172825	0.013134	-0.0143694	0.0114251	0.0195154
1124.56	-0.0172518	0.0223878	-0.00252696	-0.00245472	-0.00754857
868.466	-0.0172117	0.0370596	0.0275917	0.0305974	-0.0319226
1295.52	-0.0172003	-0.0064487	0.00764944	0.00278892	0.024779
1079.39	-0.0171413	-0.0107771	0.0269964	-0.0302478	-0.0131681
1589.78	-0.0171258	-0.012193	0.00630933	-0.0176474	0.0325914
1201.54	-0.0171167	0.0180451	-0.00462226	-0.00324909	0.017503
1334.6	-0.0171051	0.00405638	0.00672371	0.0124682	-0.00398001
1769.92	-0.0170999	0.0359562	-0.0226532	-0.00200986	0.0149528
1404.66	-0.0170511	0.00293136	-0.00437495	-0.0107754	0.0174859
2193.89	-0.0170338	0.0204647	-0.019554	0.00776959	0.0262352
920.33	-0.0170209	-0.0277192	0.0250344	-0.0175358	0.018308
1686.79	-0.0169991	0.0218569	-0.0130615	-0.00203071	0.0100933
896.461	-0.0169977	0.00438341	0.00362817	0.0175712	0.000896765
1908.66	-0.0169944	0.0187576	0.00102584	-0.0125904	-0.0142982
1159.54	-0.0169943	0.0205209	0.0142568	-0.00260778	-0.010375
1422.64	-0.0169727	-0.00457984	-0.0020129	0.02048	0.0237741
2051.86	-0.0169533	0.0184403	-0.0167951	0.0184907	0.0214482
1367.58	-0.01693	0.0301945	-0.0031997	-0.000980288	0.00207941
1290.43	-0.0169238	-0.0209756	0.0277481	-0.0250394	-0.00600652
1259.59	-0.0168425	0.0327933	0.0207063	0.012333	-0.0234041
1323.59	-0.0168202	-0.0277116	0.00720397	-0.011136	0.0303165
1662.79	-0.016817	-0.0121079	-0.00982414	0.000969799	0.0302351
614.329	-0.0168066	-0.0173384	0.0293531	-0.00994084	-0.0239934
590.309	-0.0168034	-0.0160807	0.0287254	-0.0206023	-0.0110978
2156.96	-0.016797	-0.0043197	-0.0081864	-0.00508954	0.034107
1588.78	-0.0167854	-0.0176634	0.0106209	-0.0125866	0.0356358
574.334	-0.0167805	-0.0493578	0.042248	0.0125403	0.0232105
877.385	-0.0167721	-0.0276635	0.0132181	-0.0202639	0.000995645
943.509	-0.0167662	-0.0056645	0.0070513	-0.0244267	-0.00519255
1924.74	-0.0167512	0.0184824	-0.0124493	0.0153698	0.0169613
682.239	-0.0167278	-0.0167958	0.0192102	-0.0190664	-0.00377427
809.465	-0.0167264	0.0441112	0.0290024	0.0294692	-0.0458778
1446.68	-0.0166886	0.0496806	-0.00334666	0.0137308	-0.00497514
1524.61	-0.0166876	-0.0231152	0.00278327	0.00734064	0.025025
1320.58	-0.0166664	-0.0144288	0.0110873	0.0162915	0.00868537
1204.56	-0.0166605	0.0146193	-0.00171667	-0.0301729	-0.00510113
2346.51	-0.0166526	-0.0359206	0.0181087	-0.00375428	0.0322034
1520.63	-0.0165873	0.0275818	-0.00197151	-0.00642139	-0.0140598
1506.71	-0.0165468	0.0229007	-0.00569048	0.000316676	0.0155687
923.329	-0.0164943	-0.00330971	0.00593244	0.0120395	0.00351158
903.34	-0.0164713	0.00887604	0.0261767	-0.0131724	-0.0181297
1192.45	-0.0164474	0.00189609	0.0107341	-0.017504	-0.00781788
2230.63	-0.0164429	0.0137364	0.0128631	-0.0166248	-0.0132418
1476.67	-0.0163983	-0.00707979	0.00576801	0.0216179	0.0157489
962.471	-0.0163945	0.010567	-0.0142611	-0.00129803	0.0143461
1234.47	-0.0163875	0.0198436	0.0108698	-0.0205942	-0.0108663
1124.43	-0.0163716	0.0134421	0.0373168	0.0257249	0.00304653
1172.52	-0.0162909	0.0346854	0.0465133	0.0322159	-0.00669957
1197.5	-0.016259	-0.0164565	0.0108984	0.00380688	0.0201637
1103.52	-0.0162337	0.000290382	-0.00357114	0.0122339	0.006606
1011.45	-0.0162218	-0.00844922	0.00198729	-0.0147846	0.00282839
1306.6	-0.0162109	-0.0425714	0.0132865	0.0469822	0.0365729
2050.86	-0.0161581	0.017691	-0.0152234	0.0180825	0.0192422
1225.58	-0.0161531	0.0266467	0.0102017	0.00931148	-0.0133266
1344.68	-0.01614	0.0588626	0.00421982	0.0123828	-0.0191667
1439.66	-0.0161317	0.0318813	-0.00402514	0.00135152	0.000369662
1343.67	-0.0161225	0.059714	0.00295893	0.0107875	-0.0199734
1019.48	-0.0161205	-0.00654862	0.0154019	-0.0187304	-0.00414097
1062.46	-0.0161181	0.0256561	0.0257162	0.00264432	0.00272248
1583.71	-0.0160728	0.0320624	-0.0101994	0.0110438	0.00993418
1235.44	-0.0160702	-0.0355695	0.023191	-0.00718435	0.0206678
902.471	-0.0160658	-0.00879496	0.00924427	-0.0046374	0.0010566
1474.59	-0.0160578	0.0227979	-0.0107837	-0.0057132	0.00965091
1628.76	-0.0160433	0.0316774	-0.0130054	0.0154323	0.00906583
1655.74	-0.0160298	0.00986861	-0.015295	0.00728613	0.0224686
1166.49	-0.0160188	0.00627853	0.00350576	-0.00866424	0.00375928
1196.62	-0.0160157	0.0315643	-0.010863	0.0026199	-0.00889888
1020.49	-0.0159566	0.0137669	-0.0007593	-0.0274933	-0.00140771
1500.63	-0.0159445	0.047316	0.000981162	0.0129387	-0.00598615
1591.71	-0.0159359	-0.00128835	-0.0113768	0.0242064	0.0199881
1204.45	-0.0158228	-0.0237201	0.0396262	-0.0179695	-0.00545599
1076.52	-0.0157714	-0.00998517	0.0128057	0.0116113	0.001015
1647.75	-0.0157442	0.022533	-0.0101595	0.0215895	0.0029792
1781.9	-0.0157397	0.0389404	-0.0107212	0.00869265	-0.00475428
865.379	-0.015727	0.00792495	0.0612791	0.00187447	0.0113929
825.387	-0.0157223	-0.0144991	0.0187835	-0.00771797	0.00453116
935.391	-0.0157007	0.0119451	0.0471669	-0.0101681	0.000782172
1242.48	-0.0156993	0.00939662	-0.00405562	-0.0145877	0.00261877
907.317	-0.0156873	-0.00287847	0.061303	-0.012252	-0.0242308
952.321	-0.0156524	-0.0397584	0.0460593	-0.0132063	0.0116334
2166.84	-0.0156397	0.0184348	0.00475222	-0.000213575	-0.0229334
575.337	-0.0156388	-0.0391774	0.0356803	0.0101395	0.0209055
603.295	-0.015615	-0.0259879	0.0550782	-0.0237283	-0.0188599
1731.72	-0.0155849	-0.0012026	-0.00664431	0.0191342	0.0285901
1680.75	-0.0155848	0.0252599	-0.014117	0.0221298	0.0156941
934.382	-0.015583	-0.00279737	0.0300937	-0.0112948	-0.0159749
892.405	-0.0155344	-0.0276706	0.0234496	-0.00347369	0.0132155
1304.5	-0.0155318	0.0384399	0.0412508	0.0159544	-0.0278149
1547.66	-0.0155235	0.0117382	-0.00451389	-0.00278982	0.0017429
1654.62	-0.0155204	0.00959985	0.021816	0.000625001	-0.00989374
1161.54	-0.0154989	0.00108409	-0.00725802	-0.0170436	-0.0254243
740.407	-0.0154938	0.0304616	0.036858	0.00547388	-0.0300215
846.433	-0.015472	-0.0174999	0.00193076	0.00990685	0.0203639
1113.52	-0.0153966	0.00127313	0.0228422	-0.0211192	-0.0166571
1373.65	-0.0153789	0.03291	-0.00361255	0.0105335	-0.00501891
860.389	-0.0153288	-0.017992	0.0194612	0.000809957	0.0184385
2158.96	-0.0153133	0.00961412	-0.00994088	0.00303363	0.0248012
1121.58	-0.0153015	0.0244963	0.00767746	-0.0013445	-0.00961625
1223.5	-0.0152863	-0.00725056	0.00358763	-0.000330218	0.0223243
930.429	-0.0152187	-0.0303369	0.0123504	0.00285602	0.00683444
954.477	-0.0152156	0.00578361	0.00626564	-0.00517318	0.00216961
1517.68	-0.0152098	0.0239254	-0.00911456	0.0252375	0.00416869
1052.59	-0.0151937	-0.0505767	0.000682065	0.0459362	0.0269266
1243.48	-0.0151919	0.00951415	-0.00394583	-0.0146776	0.00391869
846.453	-0.0151785	-0.0228355	0.0101241	-0.0161487	-0.00224412
906.323	-0.0151664	-0.00313931	0.0589656	-0.0109402	-0.0203651
1870.86	-0.0151444	0.0298782	-0.0081208	0.0171014	0.00418602
2113.92	-0.0151432	0.0187226	-0.0225532	0.00456256	0.0205517
959.402	-0.0151059	-0.000781839	0.0265158	-0.00114649	-0.0308566
1590.7	-0.0150543	0.0039751	-0.00134623	0.00540148	0.00479871
1523.61	-0.0150413	-0.0149246	8.37617e-06	-0.000589586	0.0224121
1855.91	-0.0149426	0.0358559	-0.0172298	-0.00730584	0.00471312
676.312	-0.0149241	-0.0116981	0.0208442	-0.0235816	-0.0102449
1447.68	-0.0149235	0.0430955	-0.00478687	0.0113417	-0.00411959
1370.67	-0.0149196	0.00531744	-0.00839111	-0.00433629	0.0144802
907.404	-0.0149049	-0.0315049	0.025709	-0.00780666	0.0113276
1160.51	-0.0149011	0.00984185	0.0158995	-0.0100098	-0.0274274
1097.48	-0.0148833	-0.000851919	0.00589288	-0.0140996	0.00652947
1858.83	-0.0148819	0.00180653	-0.0145077	0.0208361	0.0306058
1958.96	-0.0148519	0.0344999	-0.0246799	0.0130192	0.0198626
1023.47	-0.014851	0.0156894	0.00255978	-0.00216505	-0.00650449
916.414	-0.014849	-0.00917893	0.0105489	-0.0127079	-0.000803462
1104.61	-0.0148162	0.0266265	0.0296021	0.0134062	-0.0161942
1193.46	-0.0147643	-0.0107424	0.0274161	-0.0190927	-0.00766366
629.338	-0.0147007	-0.0141435	0.0106855	-0.0195422	-0.000300562
755.383	-0.0146975	0.00810591	0.000375083	0.000696556	0.00470998
889.395	-0.0146891	-0.00712814	0.0291568	-0.0148719	-0.0203123
1054.46	-0.0146888	-0.00833644	0.0165916	-0.0175721	0.0073623
1599.75	-0.0146651	0.0227459	-0.00258821	-0.00861938	-0.00236891
1345.68	-0.0146378	0.0540899	0.00414084	0.0119819	-0.0178326
1144.56	-0.0145281	0.0193172	0.0248599	0.0013897	-0.0411121
917.482	-0.0145197	0.00595372	0.0125059	-0.00199444	-0.0111831
1336.56	-0.0144929	-0.0343987	0.00897348	0.00994242	0.0247495
1129.53	-0.0144904	-0.0067043	0.00307783	-0.00397908	0.00417
1089.53	-0.0144761	-0.0094958	0.00312649	0.0139512	-0.00188777
1387.62	-0.0144516	-0.00047472	0.0140442	-0.0060692	0.0102835
1095.47	-0.01444	-0.0346458	0.0151945	-0.0101328	0.0131266
1440.72	-0.0144361	0.0397313	-0.00826116	0.009821	-0.00397659
857.377	-0.0144078	-0.0128392	0.012496	-0.0191029	-0.00606752
2486.59	-0.0143925	0.0317909	0.00674428	0.00858614	-0.0139188
1366.59	-0.0143818	0.0250571	0.00161931	0.0069842	-0.00350142
620.243	-0.01436	-0.00503957	0.0379114	-0.00941178	-0.0251606
560.281	-0.0143462	-0.0545996	0.0389405	-0.0148752	0.0185321
1058.49	-0.014335	0.00989668	0.00708171	-0.00284877	-0.00848888
891.382	-0.0143295	-0.0291688	0.0255533	-0.0254583	0.0219783
1856.92	-0.0143279	0.0340285	-0.0161293	-0.00700155	0.00500567
1400.66	-0.0142772	-0.00952034	0.000212298	0.0361824	0.0250238
775.428	-0.014246	-0.00196963	0.0338733	-0.0266383	-0.00891714
1464.59	-0.01422	-0.00236825	-0.00470363	0.00784228	0.00825385
1627.65	-0.0141934	-0.0039288	0.00360785	0.0259732	0.0213593
630.322	-0.0141647	-0.0175325	0.0688763	-0.0191447	-0.0316347
907.433	-0.0141147	-0.0343775	0.0215219	-0.0290118	0.000424452
905.357	-0.0140862	-0.0208394	0.0283765	-0.0242743	0.00165782
993.385	-0.0140846	-6.57222e-05	0.0248812	-0.00393577	-0.00232416
1462.57	-0.0140588	0.00303169	0.00875891	-0.0197536	-0.00541767
1166.48	-0.01405	0.00521581	0.0180632	-0.00966674	0.00154281
1480.68	-0.0140371	0.0268698	-0.00375321	-0.00252264	-0.000174665
696.282	-0.0140365	-0.0506907	0.022112	-0.0139425	0.0274735
1225.56	-0.0140172	0.0223666	0.011552	0.00198157	-0.00751629
1349.59	-0.014017	0.017636	-0.00750014	-0.00304884	0.000837218
1448.65	-0.0140004	0.0277588	8.19131e-05	-0.00208402	0.00850923
1334.65	-0.013982	-0.0198153	-0.00406302	0.00357131	0.0232617
1710.71	-0.0139784	0.0155462	-0.00554042	0.0098304	0.0139491
1361.59	-0.0139565	0.0240628	0.00497638	0.00699007	-0.00110339
1211.46	-0.0139546	-0.0273253	0.0234657	0.00247137	0.0280548
1432.63	-0.0139532	0.0264578	0.012531	0.026062	-0.00489892
884.309	-0.0139459	-0.0314916	0.0204866	-0.0102076	0.0190443
913.416	-0.0139352	0.00477432	0.017369	-0.00876055	0.00319044
598.332	-0.0139155	-0.00527405	0.0233301	-0.00558804	-0.0147997
1307.6	-0.0139102	-0.0356821	0.0134169	0.0408636	0.0299924
660.315	-0.0138851	-0.0401771	0.0525256	-0.0017379	0.0138848
1782.9	-0.0138701	0.0340357	-0.0105354	0.00667694	-0.00436022
659.313	-0.0138672	-0.045042	0.0528153	-0.00420214	0.0184656
1392.56	-0.0138595	0.025962	-0.00310612	0.02507	-0.00211866
829.446	-0.0138419	0.0127446	0.0197553	0.00151394	-0.0153291
585.313	-0.0138401	0.0274014	0.0478687	0.0143543	-0.0374497
1599.72	-0.0138362	0.024589	-0.0182393	0.0175819	0.0204121
884.497	-0.0138341	-0.0173214	0.0133363	0.0451671	-0.0089405
1195.5	-0.0138317	-0.0262683	0.0197512	0.00156035	0.0322809
628.307	-0.0138294	-0.0247752	0.029018	-0.0166617	-0.00137152
2159.96	-0.0137977	0.0176575	-0.011682	0.00662766	0.0201678
631.327	-0.0137971	-0.0127138	0.0553632	-0.0108945	-0.0260199
1871.86	-0.0137849	0.0276648	-0.0085869	0.0171133	0.00356823
1134.45	-0.0137639	-0.0265779	0.00308418	-0.00910715	0.0267435
1829.84	-0.0137575	0.0323898	-0.0151467	0.00340424	0.0108906
1165.5	-0.0137316	0.0133436	0.0112648	-0.00580087	0.00344339
870.445	-0.0137078	-0.0102955	0.00529554	0.00873158	-0.00173202
678.228	-0.0136854	-0.0266284	0.036396	-0.0352834	-0.0094867
1318.46	-0.0136449	-0.0355462	0.0360392	-0.00273819	0.0222991
788.44	-0.0136359	0.00514245	0.0372457	-0.00848288	-0.014858
1367.66	-0.0136094	-0.0370561	-0.000905014	0.0522501	0.0269167
1367.7	-0.0136052	0.0278522	-0.00495322	-0.00766059	-0.0104534
783.377	-0.0135743	0.00440651	-0.00213851	-0.00978139	0.00636809
853.455	-0.0135732	0.0150858	0.00642052	0.00506069	-0.0124924
1311.6	-0.0135692	0.0159832	-0.00678274	0.0177764	0.000697624
1141.47	-0.013558	0.000598612	0.0192476	0.00515217	0.00393359
889.361	-0.013513	0.0186999	0.0476464	0.00360397	-0.0312157
891.322	-0.0134771	-0.0261826	0.0350652	0.00169725	0.0140674
967.32	-0.0134693	-0.0426103	0.0477596	-0.0159082	0.00923476
627.36	-0.0133582	-0.0154417	0.00855005	-0.0122373	-0.00785417
1681.75	-0.0133307	0.0232259	-0.0145283	0.0202549	0.0130151
899.515	-0.0133211	0.00224903	0.0176365	0.00679545	-0.0333607
1155.55	-0.0132882	0.00512547	0.00377651	0.00251624	0.0121357
859.35	-0.0132652	0.0190004	0.047003	0.0122998	-0.0383982
602.329	-0.0132637	-0.0132555	0.0588527	-0.0140231	-0.0290645
872.432	-0.0132626	-0.000323994	0.014295	0.00390903	-0.0135816
661.311	-0.0132501	0.0412035	0.0301624	0.0150815	-0.0286408
1697.81	-0.0132417	0.0215534	-0.0082839	0.0141211	0.00166838
1000.52	-0.0132295	-0.0513128	0.00515046	0.0529057	0.025758
1175.48	-0.0131878	0.0042488	0.0154888	-0.00817012	0.000245052
786.396	-0.0131867	-0.0080957	0.0600435	0.0195728	0.000220249
1250.49	-0.013181	-0.00793977	0.0195931	-0.015194	-0.00679612
1078.43	-0.0131583	0.0194835	0.026669	0.00580372	-0.00469334
1050.45	-0.0131565	0.000905694	0.00225676	0.00906384	0.00707134
829.41	-0.0131554	-0.019951	0.0190251	0.00683379	0.0162708
1188.46	-0.0130923	0.0314812	0.00620049	0.00346604	-0.00577178
1740.53	-0.0130356	0.0264956	0.0209111	0.00711896	-0.0238107
707.22	-0.0130283	-0.0235763	0.0482783	-0.030251	-0.0182491
940.451	-0.0129997	0.00893309	0.015769	0.00295435	1.63263e-05
1501.63	-0.0129986	0.0396557	-0.00174947	0.00989423	-0.00557021
1235.47	-0.0129485	0.0219616	0.00869276	-0.0150909	-0.0108124
1345.56	-0.0128745	0.0211549	0.0132805	-0.000425707	-0.026836
1184.48	-0.0128277	0.0240387	0.00656204	-0.00240624	-0.0156975
1208.4	-0.0128159	-0.033601	0.025321	-0.0145815	0.0135748
1236.44	-0.0127911	-0.00956623	0.0314014	0.000497947	0.00798156
1377.6	-0.0127898	-0.0046519	0.00543625	0.00447362	0.00317862
1197.55	-0.0127606	-0.0213354	-0.00202631	0.024797	0.00308643
1247.59	-0.0127596	0.02079	0.00275979	0.0218988	0.00962124
1135.5	-0.0127356	0.009259	0.0308867	-0.00726598	0.0106544
1521.63	-0.0127324	0.0209676	-0.00274374	-0.00601267	-0.0103098
1212.61	-0.0127272	-0.00745119	-0.00374934	0.0128703	0.0187012
1667.68	-0.0126435	0.00414264	0.00327806	0.00767837	0.0197686
1170.59	-0.0126425	-0.0245315	0.00103898	0.0374471	0.00851741
561.285	-0.0126365	-0.0418715	0.0287658	-0.0101549	0.0163625
1496.65	-0.0126051	0.0080807	0.000424833	0.0014204	0.00265574
2097.01	-0.0125915	0.0209533	-0.0122734	0.0147073	0.0125243
1147.51	-0.0125548	0.0369033	0.00865098	0.0176199	0.00818108
1196.56	-0.0125296	-0.00259587	-0.00486738	0.00832265	0.00911322
901.439	-0.0125285	-0.0385475	0.0138397	-0.0134709	0.0196304
952.477	-0.0125254	-0.0516298	0.00837572	0.0521975	0.0216699
1100.46	-0.0125097	-0.00188227	0.0139277	-0.0174677	-0.0117925
814.427	-0.0124655	-0.0385753	0.0303324	0.0216521	0.0137036
1451.61	-0.0124603	0.00291691	-0.00123437	0.00741608	0.02289
948.398	-0.0124527	-0.0134999	0.0333473	-0.0208782	-0.00971307
663.266	-0.0124415	-0.00863831	0.0286365	-0.0271861	-0.010641
1346.56	-0.0124287	0.0117977	0.009109	0.0131519	-0.0128736
1018.46	-0.0124286	-0.00419964	0.0216095	-0.0364184	-0.00704869
813.424	-0.0124193	-0.0437699	0.0333663	0.0264599	0.0139102
877.395	-0.0124185	0.00218346	0.0261768	-0.0102017	-0.0198922
1120.57	-0.0123981	0.0102818	0.0104016	-0.0034705	-0.0087418
1594.62	-0.0123894	0.0147574	0.023746	0.0113152	-0.0246603
1477.68	-0.012379	-0.00476259	0.00129191	0.0184739	0.0118751
1365.71	-0.0123784	0.0443047	0.0199497	0.022833	-0.0330465
568.284	-0.0123557	-0.000842175	0.00897357	-0.00465894	-0.00220454
1532.72	-0.0123463	0.0486762	0.00311621	0.0362963	-0.00633758
954.317	-0.0123192	-0.0356524	0.0348767	-0.012475	0.0124379
1224.55	-0.0123147	0.0144706	0.0444508	0.0111645	-0.0321653
865.35	-0.0122694	-0.0162968	0.0347451	0.00118226	0.0231803
691.224	-0.0122458	-0.0119322	0.0431999	-0.0220043	-0.0151023
586.297	-0.0122188	-0.0211687	0.061623	-0.00508057	-0.00987493
1039.46	-0.0122058	-0.00442528	0.0238116	-0.0156034	0.00912356
1018.42	-0.0122007	0.0122172	0.0104552	-0.0101114	-0.0171768
1742.67	-0.0121983	0.0250407	-0.00865815	0.0192553	0.0114838
1108.47	-0.0121522	-0.0116444	0.0051597	0.0338995	0.00464046
1595.75	-0.0120968	0.0169785	-0.0018813	0.00385269	0.00642154
1500.53	-0.0120801	-0.00399971	0.0113641	0.0133351	0.0161471
1584.71	-0.0120796	0.0241984	-0.00974774	0.00766989	0.00625637
1648.75	-0.0120459	0.0194526	-0.00954151	0.0180518	0.00283841
834.385	-0.0120431	0.0115762	0.0279578	-0.0047212	0.00743553
914.471	-0.0120369	-0.00186681	0.01159	0.00892401	0.000284254
881.345	-0.0120211	0.00768298	0.0633844	-0.00198545	0.00030979
1314.58	-0.01202	0.026439	-0.0117682	0.0214371	0.00341756
912.455	-0.0120009	0.030666	0.0277474	0.00406775	-0.025494
881.354	-0.0119847	-0.00308276	0.0257796	-0.00675296	0.00247176
1119.52	-0.0119634	0.0449397	0.00651495	0.0275988	-0.0137188
1312.49	-0.0119294	-0.00606046	0.0147408	-0.00272405	0.0169705
1163.48	-0.0119213	0.0375872	0.0200461	0.0209708	0.000442682
1264.57	-0.0119021	0.0368831	0.0357893	0.0214792	-0.0014392
859.428	-0.0118779	-0.00789944	0.0204397	-0.0151805	-0.0181801
890.328	-0.0118533	-0.0257397	0.0316977	0.000917796	0.0132062
892.414	-0.0117905	-0.0438945	0.0207931	-0.0196559	0.0199813
932.331	-0.0117455	0.0288576	0.0485603	0.00999768	-0.0326976
603.332	-0.0117363	-0.00908628	0.0425527	-0.0090532	-0.015342
1133.55	-0.0117087	-0.00562207	0.0193104	-0.0190729	-0.01081
1366.72	-0.0116491	0.0415241	0.0153318	0.0212362	-0.031264
1189.45	-0.0116324	0.0298652	0.00201725	0.00568129	-0.00583663
912.38	-0.0116086	-0.0261563	0.0389053	-0.00683059	0.0297743
1305.51	-0.0116053	0.0326873	0.0309811	0.0128573	-0.0224553
1161.52	-0.0115972	0.00277489	0.00887222	-0.00684643	-0.0183991
785.392	-0.0115892	-0.00856152	0.0665732	0.0184927	0.00167553
1003.37	-0.0115844	0.0351317	0.022316	0.0102188	-0.00707579
1406.55	-0.0115729	0.0145125	0.00334956	0.00804493	0.0110227
1472.68	-0.0115696	0.0188039	0.00252283	0.0233498	-0.0130144
1167.54	-0.0115559	0.0119333	0.00650378	-0.00823379	-0.00365458
1305.6	-0.0115307	-0.0490987	0.00544026	0.0476979	0.0336573
956.483	-0.0115133	0.023593	-0.00240887	0.00187259	-0.0173115
962.368	-0.0114991	1.36485e-05	0.0235632	-0.0105956	-0.0115458
638.198	-0.0114777	-0.0178254	0.0542263	-0.0269609	-0.0299935
1271.68	-0.0114155	0.0157816	0.00269716	0.0251431	-0.0170856
1001.5	-0.0114045	-0.0121759	0.015438	-0.0227347	-0.00679756
1041.57	-0.011395	-0.00997299	0.00639002	0.0113442	-0.012124
2098.01	-0.0113303	0.0371216	-0.0148577	0.015159	0.00241242
1180.46	-0.0112748	0.0136896	0.0228205	-0.00715649	-0.00105618
1111.47	-0.0112729	-0.00680266	0.0316808	0.0131602	0.0310667
1083.62	-0.0112537	0.0167208	0.0109066	-0.0226626	-0.0243987
797.391	-0.0112486	0.00373987	0.00754678	-0.00426123	-0.00121355
937.31	-0.0112362	-0.0032409	0.0622377	-0.0205577	-0.0351649
949.309	-0.0111657	-0.0148288	0.0578357	-0.0262361	-0.0314042
869.377	-0.0111645	-0.004318	0.0108043	-0.0131116	-0.00958956
1188.52	-0.0111102	-0.0453087	0.0214824	0.00806472	0.0367689
1322.67	-0.0110564	-0.0419726	0.000673085	0.0497278	0.0167002
1293.66	-0.011038	0.0100282	-0.00509062	0.0209294	-0.00284776
1297.52	-0.0109945	-0.0350592	-0.00185104	0.0516971	0.0133896
1720.9	-0.0109673	-0.0413691	0.000867138	0.0508292	0.0235224
1104.4	-0.0109551	0.0100914	0.0147971	-0.00541563	-0.0141797
1209.64	-0.0108915	-0.0483322	-0.00735042	0.0568315	0.0146216
888.42	-0.0108888	-0.0253164	0.0130801	-0.0170265	-0.00983399
853.491	-0.0108651	0.00638663	0.0292033	0.0286461	-0.0247353
559.306	-0.0108169	0.0168841	0.0492213	0.00376913	-0.040882
558.302	-0.0108077	0.0207397	0.0583889	0.0045512	-0.0505199
1260.49	-0.010791	-0.0133344	0.0303738	-0.0128811	-0.0116755
953.323	-0.010759	-0.0314549	0.0323324	-0.0096252	0.0131229
1212.53	-0.0107441	-0.0425594	0.000738619	0.0499539	0.0183902
1270.55	-0.0107267	-0.0495052	-0.00402446	0.0538828	0.0160503
605.273	-0.0106996	-0.0376184	0.0397276	-0.023673	-0.0065184
587.3	-0.0106744	-0.0139666	0.044115	-0.00307514	-0.00404559
1105.62	-0.0106585	0.0243992	0.0217868	0.00891883	-0.0160897
604.27	-0.0106376	-0.0477313	0.0485984	-0.0311119	-0.00874722
1342.63	-0.010592	-0.0122682	0.00737671	0.0077168	0.0161481
1497.66	-0.0105883	0.00728418	-0.00283225	0.00136273	-0.000905541
909.37	-0.0105826	-0.00542081	0.0491614	-0.00993775	0.00248527
1208.63	-0.0105682	-0.0522743	-0.00830821	0.0597276	0.0160206
939.307	-0.0105593	-0.0065794	0.0496926	-0.0199051	-0.0251503
1261.69	-0.0105381	-0.0417684	-0.00136293	0.0577559	0.0170839
908.321	-0.0104841	-0.00237733	0.0390356	-0.0115276	-0.0149923
890.364	-0.0104737	0.002343	0.0351827	-0.00164774	-0.011014
1149.61	-0.0104735	-0.0443503	-0.00208671	0.0595735	0.0200215
863.308	-0.0104233	-0.0324992	0.0246984	-0.00969579	0.0147142
623.222	-0.010393	-0.0350314	0.035711	-0.0124123	0.0117436
969.318	-0.0103582	-0.0348508	0.0373462	-0.0116634	0.00849439
869.469	-0.0103273	0.0285719	0.016091	0.0212606	-0.0221811
1473.68	-0.010326	0.0138927	-0.00133019	0.0140668	-0.0101256
612.347	-0.0103017	0.0224958	0.057492	0.015451	-0.0517526
1413.62	-0.0102664	0.00137667	0.00169306	-0.00287709	0.00845975
799.437	-0.0102541	0.0130146	0.0196902	0.0100339	-0.0213437
1178.47	-0.0102175	0.00718041	0.0219814	-0.00769641	-0.0114822
1319.51	-0.0101876	0.0311625	0.0306917	0.00670688	-0.0286601
1126.52	-0.010182	0.0211735	-0.0189188	-0.0256095	-0.0184393
866.383	-0.0101808	0.00597538	0.0432032	-0.00318723	0.00851916
759.377	-0.0101803	0.00141178	0.0224047	-0.00342794	-0.0135476
974.434	-0.0101767	-0.00619481	0.0371896	0.0469485	0.00487466
1189.52	-0.0101701	-0.0447457	0.0189855	0.00832251	0.0343596
845.413	-0.01009	-0.0287256	0.0448888	0.00643398	0.0109161
1721.9	-0.00999987	-0.0403026	0.000200555	0.0501449	0.022403
618.285	-0.00997692	-0.0253955	0.0361672	-0.022471	-0.0129871
613.352	-0.00996899	0.0206123	0.0553836	0.0171057	-0.0478515
1148.61	-0.00995776	-0.0438251	-0.00262062	0.0599495	0.0185066
1743.75	-0.00995484	0.025696	-0.000449018	0.00823849	-0.00017928
741.409	-0.00987578	0.0227805	0.0240095	0.00330871	-0.0207734
861.349	-0.00986823	0.0129485	0.0282567	0.00760994	-0.0261345
596.317	-0.00986251	0.0208884	0.0362378	-0.00415904	-0.00963625
1533.72	-0.00984908	0.0451274	0.000312218	0.0347384	-0.00814436
1020.59	-0.00979397	-0.0572284	-0.00639726	0.0424568	0.0154806
897.37	-0.00979167	0.00716646	0.0527763	-0.00893044	0.0023914
886.439	-0.00976953	-0.00910242	0.0135968	-0.00936068	-0.00051467
758.381	-0.00975823	0.00353502	0.000841735	-0.0151888	-0.00332184
2012.62	-0.00973426	-0.054834	0.00444622	0.050721	0.012463
961.402	-0.00972506	-0.000782592	0.0171268	-0.00234531	-0.0180164
1502.62	-0.0096768	0.0299491	-0.00376379	0.00826134	-0.00365601
1146.55	-0.00966837	0.0163967	0.0160321	0.00420114	-0.0307784
927.38	-0.00966735	-0.0281437	0.0383748	-0.00600003	0.0263178
891.358	-0.0096099	0.0141552	0.0366083	0.000260208	-0.0224365
648.255	-0.00958671	-0.0264733	0.0442068	-0.0105534	-0.00687649
1175.44	-0.00951594	-0.000263049	0.0305811	-0.0172917	-0.0126808
1083.63	-0.00948068	0.00778154	0.00512511	0.00441016	-0.0063007
1103.4	-0.0094723	0.0115787	0.014795	-0.00617703	-0.0185293
871.465	-0.00946585	-0.00792266	0.0116223	0.0100727	-0.0134916
575.239	-0.009451	-0.0212849	0.0294295	-0.00445275	0.00528502
1002.56	-0.00943489	-0.0487648	-0.00514317	0.0494157	0.0131928
853.332	-0.0093937	-0.0066778	0.0427882	-0.0132428	0.00389418
913.404	-0.00934208	0.00913496	0.0495921	0.0173135	-0.00589319
1210.53	-0.00930579	-0.0457201	0.00103596	0.0569186	0.0178231
1686.66	-0.00929253	-0.00107656	0.00926373	-0.00139896	-0.00236508
1306.5	-0.00922243	0.0308484	0.0272911	0.0101506	-0.021748
860.355	-0.00921861	0.0108793	0.0257271	0.00675408	-0.0209832
1125.44	-0.00918602	0.00952515	0.0233239	0.0163119	-0.00039486
968.323	-0.00917398	-0.0336396	0.0314619	-0.0125976	0.00977558
846.417	-0.009085	-0.0217092	0.0324362	0.00369905	0.0113002
946.347	-0.00901353	0.0356047	0.0358536	0.0147372	-0.0254124
1019.59	-0.00895022	-0.0583715	-0.00580396	0.0447389	0.0156934
1840.54	-0.00886097	-0.0544608	0.00136017	0.0600766	0.0137505
586.317	-0.00884383	0.0199666	0.0286457	0.00886697	-0.0245769
1570.55	-0.00884032	-0.00982302	0.0332151	0.0103032	0.0109117
861.372	-0.00878617	-0.00299354	0.0396476	-0.0276291	-0.0314808
1283.59	-0.00875762	0.00765009	0.0146278	-0.0140163	-0.0127883
1618.68	-0.00870346	0.0241598	0.0103816	0.0132701	-0.02888
1081.51	-0.00861929	-0.0591521	-0.00481151	0.0432569	0.0136444
1211.53	-0.0086177	-0.0437841	0.000319775	0.0524366	0.0165407
951.308	-0.00849149	-0.0116608	0.0444844	-0.0202912	-0.0228884
814.382	-0.00848993	0.0120447	0.0326756	0.000653721	-0.0199042
1157.4	-0.00847585	-0.0292127	0.024666	-0.00793907	0.0123275
627.324	-0.00846516	0.000886731	0.0139264	0.000287235	-0.00223987
1098.5	-0.00845146	0.0317178	0.0158341	0.0133315	-0.0129713
885.409	-0.00843392	-0.000351481	0.00491833	-0.0240152	-0.00763379
849.421	-0.00838163	0.0207047	0.0373915	0.00691286	0.000590632
1620.67	-0.00838063	0.0222913	0.00764234	0.0258914	-0.00531723
643.355	-0.00834352	-0.0194659	0.00997079	0.000878282	-0.00425849
647.285	-0.00831944	-0.0155477	0.0357454	-0.0257531	-0.0226171
1271.56	-0.00827728	-0.0426648	-0.00402211	0.0469155	0.0123405
1120.52	-0.00824556	0.0293747	0.00287718	0.0157264	-0.00999696
709.217	-0.00823687	-0.0166821	0.0340271	-0.0229486	-0.0128923
640.195	-0.00821436	-0.0138605	0.0415302	-0.0232774	-0.0224676
666.211	-0.00820897	-0.0211052	0.0506002	-0.0250942	-0.0163087
903.502	-0.00817876	-0.00474588	0.0312009	0.0113423	-0.0258217
646.281	-0.00815365	-0.024275	0.0555297	-0.0383684	-0.0351855
872.39	-0.00815117	0.015891	0.0193843	0.0119991	-0.0226258
1118.48	-0.00814713	0.0368547	0.0524098	-0.0111592	-0.0493406
723.233	-0.00804398	-0.0145505	0.048523	-0.00428876	-0.00384787
1070.39	-0.00802391	-0.000415261	0.0366116	0.0185776	0.00742513
1174.59	-0.00800783	0.0272057	0.0033965	0.00144968	-0.0178405
790.419	-0.00796674	-0.00876428	0.0380765	0.00185263	-0.0241082
1340.6	-0.0079172	0.0261509	0.00624074	0.00519438	-0.00354617
1119.48	-0.00780934	0.0335998	0.0481637	-0.00997221	-0.0451582
817.382	-0.00780574	-0.00789448	0.0222385	0.00113117	-0.0164643
1008.51	-0.00768975	-0.0544082	0.00209309	0.0490759	0.00881075
1071.42	-0.0076841	-0.0434155	0.00618411	0.0320908	0.00328924
1147.56	-0.00767358	0.0137385	0.0130732	-0.000939716	-0.0276215
1070.42	-0.00764362	-0.054821	0.00649062	0.0418985	0.00538338
1265.57	-0.00763867	0.0271429	0.0249706	0.0153291	0.0011149
1082.51	-0.00761888	-0.0542524	-0.00438984	0.0380914	0.0106923
1137.53	-0.00761823	0.045791	0.0274391	0.0405303	-0.00724371
628.343	-0.00756698	-0.0204349	0.0196077	0.00883055	-0.00792988
2344.52	-0.00754612	0.0238398	0.0239702	0.0182922	-0.00251696
1838.54	-0.00752688	-0.0557498	-0.00379988	0.0616561	0.0135252
1039.39	-0.00750758	0.00758691	0.0260808	0.00567657	0.00285843
950.312	-0.00750312	-0.0100489	0.0426938	-0.0219428	-0.0235146
1459.6	-0.00749126	-0.0402783	-0.00472746	0.0536915	0.0120505
2099.02	-0.00748933	0.0323447	-0.0110559	0.017501	0.00124193
781.433	-0.00743808	0.0288323	0.035297	0.0346208	-0.0227488
1127.52	-0.00740131	0.01559	-0.0129256	-0.0151239	-0.013065
929.378	-0.00735451	0.00976028	0.0238666	0.00533014	-0.00887778
815.403	-0.00722684	0.00613559	0.0505813	-0.00525275	-0.0348997
614.356	-0.00721521	0.0139661	0.0283179	0.00939377	-0.0273361
554.308	-0.00720796	0.0274622	0.0443708	0.0248234	-0.0190432
1083.51	-0.00708001	-0.0538706	-0.00700757	0.0357704	0.00981127
664.213	-0.00707952	-0.0262271	0.0626235	-0.0331933	-0.0215945
721.234	-0.0070547	-0.0347455	0.0549529	-0.00891781	0.00712264
1173.52	-0.00704226	0.042814	0.0356852	0.0301224	-0.0141258
849.384	-0.00703408	-0.0129004	0.0319176	0.0129441	0.0353468
819.411	-0.00703066	0.0220344	0.0442422	0.0178341	-0.00724325
922.44	-0.00701687	-0.0422865	-0.0028982	0.0442607	0.00979996
870.454	-0.00700925	0.0238575	0.0329776	0.0166743	-0.0378608
891.439	-0.00698227	-0.016568	0.0119833	-0.0163019	-0.00546508
1309.62	-0.00696135	0.0243443	0.0295538	0.0253619	-0.0192132
1203.58	-0.00692422	0.0346013	0.00599376	0.0084754	-0.0110726
919.43	-0.00684392	-0.0574989	-0.00148949	0.0630872	0.0108703
1139.66	-0.00682116	0.0157863	0.0253891	0.0154342	-0.0348511
885.445	-0.0068071	-0.00975904	0.00834789	-0.0134897	-0.0195691
765.391	-0.00680093	-0.0412442	0.00630712	0.0473185	0.00704037
914.435	-0.00675528	-0.029753	0.0133285	0.0155881	-0.00259779
1365.65	-0.00668715	0.0438087	0.0137573	0.0181679	-0.000603539
1174.53	-0.00667035	0.0229967	0.0201759	0.0202486	-0.00731974
1310.63	-0.00666959	0.0224989	0.0213171	0.0230335	-0.0159599
854.494	-0.0066379	0.00492918	0.0180235	0.0179125	-0.0165496
1195.54	-0.00662087	-0.050076	-0.00230145	0.0612724	0.00707876
839.403	-0.00661919	0.00778222	0.00865055	0.0069746	-0.00619836
925.333	-0.00661591	-0.00298195	0.0435304	-0.0165469	-0.00623293
847.314	-0.00659554	-0.00836696	0.0620821	0.0107318	-0.00154838
1234.44	-0.00657131	0.0219984	0.0388065	0.0147502	-0.00802508
1279.57	-0.00648267	0.0242823	0.0217737	0.0128764	-0.00377815
902.422	-0.00646805	-0.0422463	-0.00331194	0.051854	0.00547228
815.476	-0.00646125	-0.00350035	0.0425881	0.0230286	-0.0239913
636.254	-0.00646102	-0.0335275	0.0393364	0.00485674	0.015577
799.408	-0.0064429	0.0311421	0.0508473	0.0005302	-0.0391012
873.385	-0.00643453	0.0259979	0.0207745	0.0175035	-0.0330842
851.327	-0.00636408	0.00316913	0.0348262	-0.000629863	0.00321696
869.45	-0.00631098	0.0294026	0.042413	0.0238177	-0.0551698
845.377	-0.00630441	-0.0155807	0.0185419	-0.0176062	0.000882254
913.423	-0.0062633	0.0157946	0.0131138	0.00771054	-0.00697915
650.252	-0.00624845	-0.0202554	0.0340337	-0.00810217	-0.001511
1041.54	-0.0062337	0.0529939	0.0395146	0.0313344	-0.0236227
942.502	-0.00622117	-0.0563379	0.00185557	0.0517202	0.00527416
1196.55	-0.00620317	-0.0468941	-0.00252998	0.0591829	0.00610183
1405.59	-0.0061641	0.0434794	0.0135551	0.00689383	-0.0192425
1042.55	-0.00614312	0.0519863	0.0357687	0.0293883	-0.0213856
933.335	-0.00613922	0.0181978	0.0302109	0.00289102	-0.0232764
1034.5	-0.00612333	-0.0464104	-0.00252625	0.0545738	0.00763874
1013.5	-0.00611822	-0.00446431	-0.00650035	-0.0168661	-0.00642526
1022.5	-0.00609158	-0.0428417	0.00429986	0.0439309	0.0055574
934.328	-0.00603085	0.0222203	0.0322079	0.00812427	-0.0226195
871.387	-0.00601829	0.0362215	0.0302414	0.0293955	-0.0414992
1529.65	-0.00601254	0.0241309	0.00442031	0.0206896	0.000383232
882.348	-0.00597439	0.00640422	0.0407043	-0.00329852	0.000515377
1007.51	-0.00589826	-0.0555736	0.000769296	0.0535156	0.00725898
665.216	-0.00585794	-0.0174857	0.0410197	-0.0206825	-0.0126321
904.506	-0.00584902	-0.00224948	0.019987	0.00609725	-0.0199227
1054.42	-0.0058203	0.00716668	0.0270939	0.0198375	0.00722826
1006.5	-0.00579807	-0.0542681	0.00109201	0.054363	0.00749436
997.313	-0.00576294	0.00720929	0.0367624	-0.00839978	-0.000439753
943.505	-0.00570738	-0.0462745	0.00114885	0.046487	0.00385056
913.334	-0.00568005	0.00168351	0.0473254	-0.0125929	-0.0052029
920.432	-0.0056514	-0.0547155	-0.00190976	0.0629404	0.0101729
857.45	-0.00564373	-0.0425751	-0.00238615	0.0423842	0.00140715
914.409	-0.00562346	0.00954764	0.0335811	0.0138598	-0.0022053
1068.51	-0.00548672	0.037805	0.0259091	0.0400749	-0.005792
1321.56	-0.00546912	0.0144649	0.0325441	0.00254824	0.00165689
984.525	-0.00543139	0.0346129	0.016988	0.0186456	-0.0218584
1305.59	-0.00533038	0.0163278	0.00690533	0.00809344	-0.0225441
1097.5	-0.00526865	0.0124181	0.0131427	0.0141336	0.00256081
913.439	-0.0052645	-0.0322168	0.0111094	-0.00516339	0.00181336
1322.56	-0.00520495	0.0149186	0.02798	-0.00153595	-0.00246405
687.344	-0.00517522	0.00807197	0.0247838	-0.00516395	-0.0215097
1044.45	-0.00512163	-0.0485793	0.0101143	0.0447022	0.0128727
1426.67	-0.00511066	0.0476371	0.0190957	0.0363575	-0.0070697
866.327	-0.00505881	-0.00793554	0.0360387	-0.0089964	0.00486876
1406.6	-0.00498184	0.0330879	0.00891532	0.00355726	-0.0130513
1069.43	-0.00496158	-0.0522547	0.00732871	0.0483476	0.00300154
938.312	-0.00495797	0.000699393	0.0419915	-0.0179918	-0.0260286
831.447	-0.00494987	0.0303195	0.0313628	0.0211632	-0.0165699
1280.53	-0.00489549	0.0288809	0.0304989	0.0187796	-0.0076583
823.444	-0.00487415	0.0294189	0.0272112	0.0447422	-0.00990326
574.306	-0.00482594	0.004792	0.038892	-0.0131025	-0.0167043
1140.66	-0.00481972	0.0133036	0.0210805	0.0115271	-0.0293636
869.414	-0.00470438	0.0035143	-0.00288808	-0.0190648	-0.00292579
921.435	-0.00467999	-0.0556776	-0.00178356	0.0607971	0.0079426
1051.48	-0.00467783	-0.00168882	-0.00125047	0.0155215	-0.00984984
644.339	-0.00466328	-0.0179545	0.0125329	-0.0139532	-0.0109224
1380.72	-0.00463737	0.0448144	0.0164635	0.0334658	-0.0251402
1146.42	-0.00458323	-0.0403503	0.0107709	0.0596775	0.0145694
841.382	-0.00456778	-0.00625028	0.00999603	-0.0185113	-0.00754825
923.426	-0.00452776	0.0223864	0.0278258	0.0131641	-0.0089837
816.406	-0.00452433	0.00596585	0.0311943	-0.00199626	-0.0231551
1120.48	-0.00452111	0.0219479	0.0264236	-0.00645499	-0.0294167
1028.48	-0.00451639	-0.0465511	0.00606042	0.0438403	0.0153077
1120.58	-0.00446842	0.019679	0.0270143	0.00145114	-0.0179017
1286.65	-0.00445165	0.0261336	0.00707666	-0.00910733	-0.0157137
716.334	-0.00444305	0.0051129	0.0276961	-0.00950751	-0.0182181
1350.64	-0.00443272	0.0385702	0.00254332	0.0407044	0.00282443
800.41	-0.00439642	0.0233795	0.0352044	0.000690672	-0.0287983
573.302	-0.00438369	0.00636342	0.0605984	-0.0213764	-0.0278517
676.27	-0.00437017	0.0137535	0.0521918	0.0103865	-0.039375
942.414	-0.00434642	-0.047817	0.00860656	0.0523991	0.0200072
848.391	-0.0042815	-0.0501073	-0.00373947	0.0446601	0.0058537
1037.51	-0.00428098	0.00298796	0.00593753	0.0394514	-0.00512484
1406.71	-0.00424961	0.0441659	0.00637066	0.0450473	-0.0030724
849.312	-0.00422948	-0.00634353	0.0417156	0.00782988	0.000988875
1021.52	-0.00417491	-0.0488916	0.00106863	0.0448242	0.00505968
975.437	-0.00416502	-0.00409737	0.0219189	0.029679	0.00195506
1068.42	-0.00414217	-0.0542882	0.00841686	0.0518657	0.00301011
1117.46	-0.00412902	-0.00817159	0.0263762	0.0142809	0.0232182
816.478	-0.00411804	-0.00209328	0.0294512	0.0146453	-0.0149809
1166.59	-0.00410593	-0.0307031	-0.00789417	0.029879	-0.00595183
1092.55	-0.00408747	0.00011081	0.010315	0.0263118	-0.0168314
648.219	-0.00408239	-0.0141031	0.0491094	-0.00791397	-0.00574018
1055.52	-0.00408149	0.0267827	0.0167742	0.0241964	-0.00641996
692.244	-0.00397911	-0.0121407	0.0563719	-0.0188049	-0.022538
1609.79	-0.00393645	0.0414928	0.00944392	0.0456265	-0.00835588
1427.67	-0.00386391	0.0455447	0.0172056	0.0344083	-0.00700783
970.538	-0.0038388	-0.0443164	-0.00559698	0.0484277	-0.00384469
957.386	-0.00381454	-0.0454844	0.00263681	0.0470484	0.0133545
666.192	-0.00376757	-0.0311935	0.0390423	-0.0249015	-0.00682078
835.376	-0.00373181	0.013002	0.0326965	0.00833265	-0.0111596
1194.5	-0.00367438	0.0252833	0.0382215	0.0249314	0.00886515
848.317	-0.00361714	-0.00535918	0.0372146	0.00404705	0.000824045
1428.67	-0.00359728	0.0310764	0.00898405	0.0217374	-0.00586444
741.354	-0.00355198	0.00981271	-0.00642698	-0.00605226	-0.00644782
1623.81	-0.0035412	0.0341188	0.00371807	0.0330126	-0.00575676
620.224	-0.00352206	0.0139007	0.0512521	-0.000218185	-0.0392452
1138.54	-0.00345595	0.0386391	0.0203304	0.0371909	-0.00727453
826.371	-0.00340516	-0.00689508	0.00831912	-0.0203495	-0.0125544
842.366	-0.00337454	-0.00534037	0.00691694	-0.0197503	-0.0150483
840.423	-0.00334803	0.0104539	0.00304141	-0.00694157	-0.0101322
808.433	-0.00334333	-0.0260285	-0.00178153	0.0321925	-0.00771919
1015.51	-0.00332252	-0.0100134	0.00925298	0.00544187	-0.0112701
801.393	-0.0032611	0.0131104	0.0197752	0.0272581	-0.0223517
850.332	-0.00319872	-0.00554101	0.0452598	0.00508742	0.0169113
1032.44	-0.00309387	0.0143815	0.0238195	0.0307318	-0.0149604
1154.62	-0.00308468	0.0353983	0.0337105	0.0214683	-0.0505414
777.184	-0.00307741	0.011242	0.012501	0.0390223	0.00580805
800.355	-0.00304619	-0.0260476	0.007246	-0.0112544	0.00340284
908.355	-0.002974	0.0225288	0.0415255	0.0130829	-0.0111173
941.412	-0.00296705	-0.0527585	0.00869789	0.0565995	0.0208774
1306.69	-0.00284049	-0.0347705	-0.00189749	0.0534944	-0.00211314
1381.73	-0.0027766	0.0362863	0.0124414	0.029797	-0.020182
1615.71	-0.0027626	0.0348934	0.00925885	0.0400925	-0.00160386
1407.72	-0.00274769	0.0401691	0.00562174	0.0423849	-0.00234509
772.36	-0.00274504	-0.0318431	-0.000740809	0.0131315	-0.00092227
562.306	-0.0027411	-0.013339	0.0124969	0.015985	-2.39499e-05
984.352	-0.00267124	-0.0530316	0.00506542	0.0483313	0.00485906
916.45	-0.00255863	-0.0228954	0.00503799	-0.0116134	-0.00992137
1351.65	-0.00242917	0.0328544	0.00286376	0.0378406	0.00140004
1305.68	-0.00239245	-0.0400408	-0.00131475	0.0611852	-0.00518052
1003.33	-0.00237212	-0.0448586	0.011982	0.0436185	0.0181504
664.25	-0.00224356	-0.00649831	0.0423055	-0.0158086	-0.0156034
863.389	-0.00223613	0.00445633	0.0328344	-0.00688421	0.00548401
1488.59	-0.00217597	0.0401201	0.0213401	0.0319647	-0.00621782
968.481	-0.00216395	-0.00155162	0.00019713	-0.00948853	-0.0065943
1228.68	-0.00203792	-0.0371932	-0.00278146	0.0636904	-0.00907047
839.316	-0.00198663	-0.00275488	0.0494872	-0.00991552	-0.0024413
1155.62	-0.00196602	0.0329782	0.0302934	0.0200782	-0.0464277
887.423	-0.00195052	-0.016626	0.0132641	-0.0190647	-0.00577005
828.422	-0.00191387	-0.0024925	0.00590026	-0.00100875	0.000760948
953.344	-0.00191331	0.0117457	0.0362303	-0.000217496	-0.0296865
1180.4	-0.00191304	0.0214388	0.0405103	-0.0103665	-0.0340743
958.379	-0.00189818	-0.0453578	0.00935105	0.0435582	0.0140104
981.35	-0.001862	-0.0567324	0.00350372	0.0549151	0.00544328
1012.41	-0.00175745	-0.0417217	0.000492167	0.0417926	-0.00140896
1024.42	-0.00174253	0.0224846	0.0419814	0.0377478	-0.0134516
1069.51	-0.00172967	0.034126	0.0205141	0.0360543	-0.00589957
983.35	-0.00170147	-0.0577161	0.00381359	0.0534024	0.00524985
675.273	-0.00161106	0.0140657	0.0452854	0.00678193	-0.0336764
982.354	-0.00156929	-0.0575966	0.0043444	0.0523857	0.00516874
674.27	-0.00148318	0.01767	0.0613947	0.00968525	-0.0457656
943.266	-0.00147643	0.00663996	0.0497867	-0.00574231	0.00153705
807.375	-0.00146326	0.00292924	0.0453389	0.0140519	0.0195145
620.321	-0.00140632	-0.00738036	0.0328401	0.0209521	-0.00628708
1610.79	-0.00135658	0.035613	0.0100752	0.0423306	-0.00904259
1293.68	-0.00129755	-0.0399577	-0.00279335	0.0619534	-0.00896239
1291.67	-0.00128054	-0.0405267	-0.00413404	0.0638634	-0.00580299
819.399	-0.00121855	0.0124309	0.0514112	0.0163461	-0.00811423
1482.69	-0.0011262	0.0409952	0.0169666	0.04593	-0.00505751
1508.74	-0.001002	0.0451906	0.0233277	0.0513828	-0.0156478
1489.6	-0.000994835	0.0335934	0.0157343	0.0278148	-0.00553673
823.373	-0.000928561	0.0117359	0.0298796	0.0225016	-0.00309546
1697.86	-0.000903494	0.02963	0.0140972	0.0374497	-0.00634004
1292.67	-0.000859561	-0.0403714	-0.0042203	0.0637242	-0.00665672
1495.73	-0.00084374	0.0304225	0.00447867	0.0395376	0.000102272
883.392	-0.000832611	-0.00161795	-0.0103436	-0.034469	-0.0109549
1227.67	-0.000680743	-0.0409276	-0.00409619	0.068869	-0.0109493
634.33	-0.000554451	0.0200134	0.049948	0.0141349	-0.00540322
963.365	-0.000506175	0.0165114	0.0251693	0.00173266	-0.0274915
957.377	-0.000498624	-0.0539574	0.0118741	0.050485	0.0152243
1020.52	-0.000464342	-0.0487023	0.000855825	0.0482248	0.0029847
1019.3	-0.000416424	-0.0454707	0.0126896	0.0409611	0.0144443
1036.45	-0.000348206	0.0209688	0.0225621	0.0267314	-0.0124139
1034.58	-0.000225168	0.0424907	0.0227939	0.0462179	-0.0144171
903.4	-0.000187544	0.0282772	0.0403384	0.0368903	-0.0123334
1035.58	-0.000181262	0.0429975	0.022458	0.0448475	-0.0137141
901.418	-0.000125013	-0.0465603	-0.00801635	0.0624198	0.00504951
571.304	-9.02876e-05	0.0209718	0.0459017	0.0164993	-0.0178923
845.473	-1.60898e-05	-0.0438679	0.000480063	0.050254	-0.00472284
758.454	1.09288e-05	-0.00173109	0.0378151	0.0206642	-0.0190235
863.313	0.000272012	0.0146034	0.0297328	0.0311106	-0.0274679
965.425	0.000340955	-0.00436327	0.0258664	0.0127426	-0.0203758
570.3	0.000465944	0.0275336	0.065203	0.0191991	-0.0302167
1012.38	0.000728945	0.00367896	0.0416371	0.0286056	0.0107418
1509.75	0.000746775	0.0405075	0.0219504	0.0492398	-0.0146782
1140.45	0.00100188	0.0223732	0.0367177	0.00251745	-0.00462089
1355.59	0.00102382	-0.0351082	-0.000357376	0.0481557	-0.00894415
1354.6	0.00112729	-0.0350294	0.00171129	0.0508684	-0.0117796
1353.6	0.00114579	-0.0405331	0.00197673	0.058492	-0.0118492
859.339	0.0012466	0.00425166	0.0374675	-0.00241875	-0.0339386
745.227	0.00129017	-0.00980349	0.0499027	0.00338129	0.0150094
728.407	0.00172291	0.0206985	0.0346986	0.0094803	-0.0234244
835.364	0.00189707	0.0135719	0.0469947	0.0150208	-0.0119847
556.186	0.00203652	-0.0106854	0.0486241	-0.0114481	0.0112498
852.385	0.0022558	-0.00357529	0.0374259	0.0166947	0.0159522
894.195	0.00241443	0.00747961	0.00634682	0.0398825	0.000146413
632.224	0.00242757	0.0171022	0.0447052	0.0075172	-0.0195807
1536.8	0.00253383	-0.00797867	0.000273798	0.00212536	-0.00465634
844.47	0.00264348	-0.0497003	0.000261655	0.0553618	-0.00824024
896.671	0.00274344	-0.00126754	-0.00217425	0.000725288	-0.0057379
1421.79	0.00280955	0.0323981	0.0189721	0.0373393	-0.020881
839.338	0.00296306	0.0250857	0.0551187	0.0348975	-0.0161958
925.475	0.00297652	-0.0319321	-0.00436314	0.0250459	-0.0161053
959.496	0.00332937	-0.0281608	0.000876337	0.0296052	-0.00994304
1422.79	0.00346369	0.0289145	0.0172565	0.0371772	-0.0183482
1260.72	0.00358726	-0.0122772	-0.0101144	0.0211317	-0.0341475
1057.54	0.00395833	0.0278106	0.0327247	0.0345677	-0.0176967
847.408	0.00409386	-0.0178332	-0.012295	0.013971	-0.0176473
841.407	0.00415893	-0.00689713	0.0143621	-0.0183118	-0.0304969
2149.24	0.00416808	-0.00127324	0.00188622	-0.000442762	-0.00509991
894.582	0.00433543	-0.00115309	-0.00267538	-0.000452735	-0.00575747
784.36	0.00480753	-0.00853521	0.0023952	-0.0192449	-0.00896037
669.333	0.00481851	-0.0081004	-0.00666797	-0.0152181	-0.0122775
806.368	0.00489279	0.0172813	0.0420443	0.0172465	0.00157903
900.456	0.0050708	-0.0111249	-0.00528675	-0.0334295	-0.0139107
768.456	0.00522913	-0.00122512	-0.0015744	-0.000188087	-0.00434148
1533.73	0.00562609	-0.00567769	-0.000998563	-0.00667108	-0.00575471
1259.71	0.00581303	-0.0144061	-0.0119965	0.0234096	-0.0384493
766.921	0.00603604	-0.00160476	-0.00238514	-0.000849525	-0.0070088
1581.81	0.0067025	-0.01273	-0.0108138	0.0132811	-0.0229531
1968.33	0.00679146	0.00387664	0.0168874	0.0489183	0.00240951
711.352	0.00712268	0.000774889	-0.00715828	0.00270154	-0.00209386
791.332	0.00717187	0.0266387	0.0462174	0.0304576	-0.00204439
893.418	0.00823409	-0.0322592	-0.000754939	-0.0133189	-0.0114239
1351.66	0.00829827	-0.0275152	0.00254532	0.0019537	-0.00740652
1045.21	0.00852471	0.00759612	0.00829743	0.0332297	-6.49037e-05
941.184	0.00883573	0.00920195	0.010673	0.0343715	-0.00178142
1349.65	0.00939068	-0.0308352	0.00418274	0.00615485	-0.00938793
1590.13	0.00945725	-0.0017677	0.00031584	0.00225499	0.00388032
1346.62	0.00948108	0.00752673	0.00322111	-0.00672634	-0.00133011
767.688	0.00956245	-0.00161624	-0.00367325	-0.000249949	-0.00982465
2345.9	0.00967029	0.00831476	0.0113391	0.0434302	0.00359968
1350.66	0.00970804	-0.0321629	0.00291807	0.00425363	-0.00990645
560.079	0.00983842	0.00802338	0.011857	0.0263211	0.000308344
1250.99	0.00985207	-0.00259078	-0.00584575	0.00362641	-0.0102207
1406.94	0.00990227	0.00253533	-0.009291	-0.00496977	-0.0106106
1971.98	0.0100949	0.0059723	0.00926716	0.0503134	0.00559417
612.311	0.0101101	-0.00518549	0.012903	-0.0203249	-0.021454
617.338	0.0101119	-0.0257773	0.00323346	-0.0365727	-0.00771654
1650.17	0.0102857	0.0168362	0.0327584	0.0104648	0.0427038
2045.84	0.0105332	0.0158051	0.0244846	0.0266516	0.0156205
2011.92	0.0112847	0.0122853	0.0235927	0.00772659	0.0301648
1183.54	0.0113401	-0.00234692	-0.0170677	-0.0247143	-0.0122687
945.466	0.0113544	-0.00597976	-0.00150656	0.00720742	-0.0360742
768.355	0.0114195	-0.018933	-0.00661961	0.0139403	-0.026312
990.539	0.0114714	-0.0150425	-0.00971732	0.0203215	-0.0391182
1129.22	0.0115314	0.0102082	0.0117419	0.0464812	-0.000251399
796.122	0.011677	0.00393507	0.00481764	0.0138945	0.00379963
923.173	0.0117941	0.00805851	0.00880719	0.0259778	-0.000748178
707.148	0.0119795	0.00958222	0.0122514	0.0320953	0.00113035
1112.21	0.0123036	0.00856986	0.0105434	0.0463515	-0.000753816
1445.17	0.0123649	0.017335	0.038175	0.00823015	0.0519232
745.094	0.0125405	0.017649	0.0263409	0.0376762	0.00986523
893.104	0.0127603	0.0141695	0.0175828	0.0220761	0.0106868
1205.12	0.0127738	0.0189208	0.0329812	0.0129883	0.0379367
855.162	0.0128206	0.00711213	0.00712321	0.0254297	-0.000441406
966.16	0.0130041	0.00961983	0.01271	0.0382477	-0.000708039
1044.21	0.0132135	0.00842839	0.0102671	0.0437341	0.000484148
1440.16	0.0132682	0.0182926	0.0312754	0.0153234	0.0328488
1522.05	0.0133149	0.0177774	0.036316	0.000904126	0.054932
1067.08	0.0133931	0.0168754	0.0371145	0.000125766	0.0588755
968.997	0.0137035	0.0201966	0.0311903	0.0336369	0.0192129
1256.13	0.0137989	0.018129	0.0405082	0.00458947	0.0591626
1050.11	0.0138205	0.0156432	0.0383974	0.000517118	0.061106
1124.07	0.0138611	0.00809177	0.0134365	0.0357762	0.00673282
940.18	0.0143713	0.00986135	0.0123401	0.0435138	-0.000349539
1444.17	0.0144153	0.0193623	0.0417715	0.00995843	0.0558536
1674.15	0.014583	0.0186806	0.0370456	0.0081255	0.0468176
1633.96	0.0146272	0.0162027	0.0370717	0.00198717	0.0525286
1272.09	0.0146367	0.0201337	0.0392433	0.00443647	0.0561731
1629.2	0.0147921	0.0229196	0.0363779	0.0260652	0.0315064
1325.64	0.0149687	0.00890661	-0.0130654	-0.0217558	-0.0227561
919.469	0.0149915	-0.0207997	-0.0135673	0.00938825	-0.0308551
1403.21	0.0150499	0.0194399	0.028532	0.038081	0.0128392
1321.03	0.0152019	0.0125952	0.0245327	-0.00705783	0.0419995
1026.11	0.0152128	0.0180731	0.0262534	0.0278594	0.0183208
989.166	0.0153268	0.00903812	0.0127595	0.0418287	0.00147603
790.087	0.0153285	0.0181783	0.0291587	0.0384605	0.0116019
1214.03	0.0153945	0.00871833	0.0141911	0.0122036	0.0114007
1612.23	0.0156068	0.0226031	0.0429334	0.0210054	0.0422611
1817.25	0.0156864	0.02396	0.0372596	0.0298687	0.0288106
1398.92	0.0157875	0.0125405	0.0193499	-0.0147852	0.0427649
797.129	0.0157912	0.00626722	0.00501585	0.0122921	-0.000606484
1424.19	0.0158036	0.021691	0.0426393	0.0169863	0.045746
1111.21	0.0158584	0.00826415	0.0100486	0.0539348	0.00207278
865.041	0.0158669	0.0159206	0.0311464	-0.00426634	0.0275523
979.129	0.0160011	0.019312	0.0307016	0.0508893	0.00983526
1500.07	0.0160156	0.0189692	0.0317192	0.0029548	0.044621
1356.98	0.0160831	0.0172967	0.0340416	-0.00692443	0.0569343
1215.15	0.0161081	0.0197198	0.0286451	0.0361097	0.0152714
557.055	0.0161174	0.0151531	0.027064	0.0212263	0.0207594
1196.18	0.0161274	0.0109951	0.011512	0.0161925	0.00488566
1673.15	0.0162178	0.0207375	0.0394084	0.00963461	0.0493417
1016.07	0.0164308	0.0242498	0.0389955	0.0265038	0.036216
551.128	0.0164309	-0.00291072	-0.00690205	0.0156014	-0.0220259
1439.17	0.0164556	0.0131123	0.0225641	0.00440941	0.0355846
1608.64	0.016584	-0.00505979	-0.00812834	-0.0196218	-0.00234533
1611.22	0.0167664	0.0232867	0.0434945	0.0210934	0.0438453
2043.84	0.0170082	0.0179666	0.0303421	0.0334142	0.0222947
1387.57	0.0170195	0.00353107	-0.0114523	-0.0192633	-0.0173753
1967.97	0.0170516	0.00490549	0.00841919	0.0613624	0.00401317
1066.08	0.0170935	0.0196241	0.0410539	0.00119159	0.0639888
1271.1	0.017162	0.0158018	0.0322848	0.00087284	0.0535691
619.054	0.0172928	0.0149345	0.0254153	0.0086644	0.0221246
903.01	0.0173148	0.0158144	0.0351684	-0.00832065	0.0599077
2469.7	0.0174125	0.0130431	0.0211751	0.00249282	0.0198972
1255.12	0.0174576	0.0213171	0.0444183	0.00651853	0.0626011
1082.05	0.017592	0.0158841	0.0322996	-0.0049163	0.0594369
1969.98	0.0177506	0.00593921	0.0126969	0.0609334	0.00434715
1091.06	0.0177619	0.0171801	0.0370885	-0.00272212	0.0592501
1488.1	0.0179217	0.0105478	0.0142086	-0.00857008	0.0236158
2423.77	0.0180249	0.0207223	0.0339943	0.0442305	0.0203058
902.016	0.0180339	0.016037	0.0348194	-0.00852233	0.0601293
630.054	0.0180429	0.00143296	0.0100727	0.0135181	-0.020094
1271.09	0.0181621	0.0227335	0.0427483	0.00523858	0.0607266
1485.11	0.0181887	0.0206206	0.0393761	0.00468716	0.0554667
1527.05	0.0184955	0.0163634	0.0255589	-0.00413284	0.0407674
1259.11	0.018519	0.0159457	0.0289522	0.000109334	0.0437105
871.02	0.018562	0.0190884	0.0317883	0.00551447	0.0411843
1476.09	0.0186265	0.0244309	0.0408565	0.00987626	0.0542098
1193.91	0.0186417	0.0129781	0.0213024	-0.0174824	0.0489898
752.141	0.0187017	0.0105722	0.00876793	0.0464653	-0.00264902
610.076	0.0187881	0.00660091	0.00823315	0.00320355	0.00583533
1610.63	0.0188046	0.00312891	0.00295733	-0.0161402	0.00629936
978.128	0.0189186	0.0192122	0.031461	0.0589298	0.0105101
922.169	0.0190734	0.0080107	0.0119319	0.0347195	0.000382599
1425.18	0.0192022	0.0123695	0.0160075	0.00165184	0.0163775
1214.17	0.0192506	0.020234	0.0295925	0.0361351	0.0172433
1670.55	0.0192536	0.00370327	0.00335168	-0.0222044	0.0146459
1113.01	0.0192948	0.00941314	0.00847326	-0.0140997	0.0241712
1031.13	0.0193223	0.00943759	0.0174894	-0.00552473	0.0233374
1949.76	0.0196553	-0.00243379	-0.00780958	-0.00614218	-0.0167032
1438.16	0.0198267	0.0146397	0.0243599	0.00433619	0.0380535
1574.69	0.019828	-0.00304689	-0.0132914	-0.0262911	-0.00857656
1665.89	0.0198524	0.0221976	0.0382797	0.0252564	0.03208
1654.58	0.019881	0.00267616	0.00512509	-0.0238239	0.018267
1133	0.0198967	0.0161629	0.0279731	-0.00809001	0.0491424
2091.78	0.0199314	0.0120394	0.0186962	-0.00194344	0.0206408
799.121	0.0200604	0.00889584	0.0103365	0.0255294	0.00247287
588.088	0.0200858	0.00271747	-0.0241948	-0.0136569	-0.0412499
1486.1	0.0201687	0.0141742	0.0202919	-0.0041235	0.0335505
840.094	0.0202473	0.0174894	0.0382411	-0.00251815	0.0576326
1324.64	0.0203168	0.0147558	-0.0134234	-0.0251335	-0.0285379
601.098	0.0203921	0.00331564	-0.0239676	-0.0132278	-0.0408966
1311.03	0.0204423	0.0197173	0.0315228	-0.00426547	0.0519553
1250.12	0.020558	0.0143294	0.0247084	-0.00153025	0.0432939
1592.02	0.0206268	0.0064209	0.0133579	0.0378819	0.00970005
1760.72	0.0207304	-0.00302227	-0.0062779	-0.0108607	-0.015358
1439.15	0.0207639	0.0256839	0.0400699	0.0244078	0.0368784
988.162	0.0207887	0.00831804	0.0132456	0.0486507	0.00167256
1121.99	0.0207985	0.0148095	0.0237955	-0.0121573	0.0536606
1106.03	0.0208434	0.01184	0.0222383	-0.00924514	0.0470495
1525.05	0.0208802	0.0181579	0.0273381	-0.00340888	0.0429414
1196.2	0.0208854	0.0188784	0.0316165	0.00899617	0.0389442
1652.17	0.0209287	0.020282	0.0305536	0.0102787	0.0335227
1484.11	0.0209386	0.0224168	0.0413102	0.00529982	0.057264
987.178	0.02105	0.0078615	0.0113835	0.051734	0.00096431
2421.77	0.0210731	0.0189371	0.0358243	0.0447579	0.0203047
1465.13	0.0210734	0.0190873	0.028891	0.00530115	0.0364702
789.084	0.0211078	0.0191277	0.0330601	0.0464435	0.0133494
1195.18	0.0211278	0.0122874	0.0141629	0.0176156	0.00675319
1107.02	0.0212226	0.0197921	0.0353597	-0.00489061	0.0593644
1062.07	0.0212706	0.0218549	0.0341162	0.00733459	0.0475206
1594.67	0.0213179	0.00086443	0.00482292	-0.0193176	0.0134298
1615.59	0.0213357	-0.000376286	-0.00857679	-0.0270227	-0.00336821
1484.65	0.0215264	-0.00464586	-0.012048	-0.0277502	-0.00650451
613.104	0.0215891	0.0153853	0.0368931	0.00729368	0.0408639
1067.51	0.02174	-0.00660152	-0.0258543	-0.0292456	-0.0256085
628.075	0.0219532	0.00916203	0.0213851	-0.00217623	0.0326522
896.963	0.021999	0.0136239	0.0232991	-0.018947	0.0509061
1131	0.022026	0.0162088	0.0278527	-0.0105501	0.049182
751.137	0.022058	0.0124566	0.0106742	0.053533	-0.00594887
1628.2	0.0220815	0.02628	0.0411692	0.0265959	0.0367358
1526.05	0.0221962	0.0181905	0.0265183	-0.00485157	0.0425872
1948.76	0.022218	-0.00262729	-0.00938635	-0.00601078	-0.0206039
1239.14	0.022295	0.0117305	0.014065	-0.00149658	0.0169218
1296.07	0.022345	0.0219639	0.0402609	0.00150235	0.0584498
1338	0.0225255	0.0176446	0.0256961	-0.00906972	0.0438278
1146.96	0.0225378	0.0155766	0.0212631	-0.0152705	0.0456996
650.047	0.0225383	0.0163957	0.0363381	-0.0100519	0.0591398
646.036	0.0226143	0.0144157	0.0251263	0.000939819	0.0311095
1386.56	0.0226671	0.00623307	-0.0104729	-0.0240036	-0.0223562
1250.11	0.0227414	0.0255707	0.0391066	0.019426	0.040727
1175.22	0.0229108	0.00912883	0.0083143	0.0505008	0.000955586
882.033	0.0229779	0.0152179	0.0291051	-0.0100084	0.0484967
1233.85	0.0229823	0.00927887	0.00464401	-0.0295621	0.0301655
733.125	0.0230504	0.00688537	0.0116989	0.0154662	0.00374572
1651.16	0.0232166	0.0209074	0.0308896	0.00879886	0.0345692
666.021	0.0232385	0.0118709	0.0242054	-0.0151232	0.0475862
985.173	0.0232673	0.0124639	0.0183011	0.0662638	0.00187352
819.116	0.0232971	0.015397	0.028489	-0.000666893	0.0381896
1360.97	0.0233175	0.0111326	0.00991817	-0.0188191	0.0275561
1627.19	0.0234624	0.0273338	0.0417568	0.0279961	0.0364995
1464.12	0.0235755	0.0191127	0.0278504	0.00345208	0.0352242
1438.15	0.0235791	0.0265396	0.0401092	0.0240855	0.0386709
897.996	0.0236451	0.0147451	0.020435	-0.0151849	0.0421756
1424.17	0.0236788	0.0121709	0.013405	0.000442575	0.0121693
556.052	0.0236856	0.0176273	0.0336273	0.0264004	0.0218717
1090.06	0.0237117	0.0199262	0.0393899	-0.00233674	0.060766
1590.01	0.0237158	0.00700508	0.0166551	0.0381678	0.00520515
1008.16	0.0237513	0.0179788	0.0319737	0.0109072	0.0387142
984.171	0.0238412	0.0104526	0.0150842	0.0676902	0.00288234
1045.11	0.0239717	0.0130349	0.0261416	-0.00332064	0.0446375
986.176	0.0241109	0.0116954	0.0170792	0.060599	-0.000835097
1170.94	0.0241502	0.0102277	0.00686607	-0.0241924	0.0283156
1713.82	0.0242198	0.0111624	0.0101574	-0.0121545	0.0230727
1400.2	0.0243907	0.0223521	0.0344994	0.0538101	0.0157488
601.046	0.0244129	0.0176641	0.0320054	0.0237787	0.0239465
1211.16	0.0244286	0.024118	0.0354135	0.0527791	0.0177499
574.063	0.024482	0.016265	0.0316212	0.0121238	0.026566
901.013	0.0245653	0.0181456	0.0366572	-0.0111269	0.0613765
1402.21	0.0245707	0.0194956	0.0321349	0.0506148	0.0163173
1524.05	0.0246316	0.0187753	0.0269475	-0.00574686	0.0430183
1258.12	0.0247131	0.0177451	0.0307946	-0.00224347	0.0449633
1287.91	0.0247396	0.0191173	0.034346	0.00937359	0.0387182
651.032	0.0247695	0.0116729	0.0207793	-0.00851337	0.0266013
1336.01	0.0247819	0.0176941	0.0250266	-0.0114377	0.0448689
1759.72	0.0247907	-0.00338513	-0.00761947	-0.0125908	-0.0209862
1401.2	0.0248176	0.0216992	0.0340503	0.053577	0.0156607
1071.07	0.0250278	0.0181743	0.0302002	-0.00202436	0.0465591
1173.93	0.0250502	0.0110492	0.00824997	-0.0247793	0.0299893
563.099	0.025191	0.00957432	0.0137409	0.0353819	-0.00276618
852.008	0.0252733	0.0148783	0.0203095	-0.0170811	0.0431321
1174.22	0.0254325	0.0112181	0.0120936	0.059611	-0.00123483
1029.14	0.0254383	0.0204996	0.042143	0.00520235	0.0558272
1275.09	0.0256732	0.0158299	0.0206951	-0.00404538	0.0336706
779.88	0.0257774	0.00879066	0.00979488	-0.0295946	0.0320462
1249.12	0.025832	0.0171569	0.0275667	-0.000465369	0.045106
550.125	0.0258425	-0.00637294	-0.0112676	0.0219765	-0.0346538
674.022	0.0260144	0.0136342	0.0300924	-0.0140942	0.0484249
841.083	0.0260325	0.00868986	0.014341	-0.0133612	0.0236047
1423.18	0.0260943	0.0254188	0.0445546	0.0172127	0.0481964
1213.52	0.0261188	-0.0026882	-0.0275718	-0.0301332	-0.0193334
855.064	0.0261197	0.0119446	0.0239552	-0.0105153	0.0443726
727.158	0.0261281	-0.0063912	-0.00744198	-0.0168223	0.0135462
839.09	0.0261603	0.0186925	0.0408388	-0.00446017	0.0586607
853.004	0.0261721	0.0153697	0.0199578	-0.0160303	0.0434683
690.991	0.0261746	0.013585	0.0230678	-0.0204413	0.0474659
819.023	0.0262215	0.0038499	-0.00462959	-0.025899	0.000270476
1212.16	0.026269	0.0238407	0.0360933	0.0508714	0.018187
1048.1	0.0262902	0.00978215	0.0105283	-0.0052225	0.0120837
936.902	0.0263658	0.00946313	0.00520439	-0.0303297	0.0296523
779.149	0.0264086	0.0046823	0.000175939	-0.00454345	-0.00289009
1249.11	0.0264791	0.0267081	0.0400061	0.019724	0.040494
693.988	0.0265134	0.00102713	0.00141737	-0.0206508	-0.00525999
1295.06	0.0266331	0.0233664	0.0409545	-0.000172621	0.0592798
1106.02	0.0266753	0.0214834	0.0373883	-0.00609448	0.0599988
1173.21	0.0267514	0.011951	0.0130711	0.0589915	-0.00013308
916.986	0.026843	0.0144406	0.0265071	-0.0172579	0.0542273
876.978	0.0268761	0.0101954	0.0067858	-0.0231945	0.0233836
1195.19	0.0268895	0.0198908	0.0324232	0.00879088	0.0386007
900.954	0.0268999	0.00341211	-0.00704698	-0.0333494	0.00362195
1614.59	0.0269265	-0.000664848	-0.00918713	-0.0321978	-0.00595803
1483.65	0.0269757	-0.00328267	-0.0104678	-0.0319326	-0.0107549
1084.05	0.0269807	0.00615638	0.00548679	-0.0159374	0.0221812
645.997	0.0270055	0.0144055	0.0248488	-0.0198762	0.04744
589.069	0.0270525	0.00270142	-0.00173776	-0.0214621	-0.00235607
943.953	0.0271718	0.0161438	0.0274406	-0.0186165	0.0517837
835.08	0.0271902	0.0171702	0.0277141	0.0143122	0.0259027
1213.17	0.0273553	0.0210522	0.0341379	0.0468145	0.0169564
882.014	0.0273935	0.00509359	0.00370112	-0.0130735	-0.0042393
1028.13	0.0274549	0.0197422	0.0428277	0.0035707	0.0549405
859.055	0.0274622	0.00668154	0.00715436	-0.0142125	0.011903
856.059	0.0276056	0.020172	0.0362689	-0.00696659	0.0551125
1422.18	0.0276417	0.0252013	0.044901	0.0170462	0.0466171
612.1	0.0276469	0.0146114	0.040783	0.00706455	0.0417104
922.967	0.0277008	0.0106445	0.00951461	-0.0247694	0.0254308
1072.06	0.0277081	0.00574901	0.000292001	-0.0190388	0.00203515
585.057	0.0277223	0.00133887	-0.00435817	-0.0206249	-0.00820407
1442.64	0.0278181	-0.00475441	-0.0111708	-0.0320267	-0.0104218
608.092	0.027866	0.00636029	0.0087722	0.00478316	0.00339793
1172.94	0.0278851	0.0122325	0.00873761	-0.0265303	0.0304708
1087.04	0.0279694	0.0191356	0.0255064	-0.00570765	0.040409
562.095	0.0280276	0.0104826	0.0152894	0.0385132	-0.00278211
1112.01	0.0280633	0.0120758	0.0112246	-0.0179841	0.0247722
1045.1	0.0280793	0.0235074	0.0418348	0.00427136	0.0542694
1337	0.0280965	0.0194911	0.0266686	-0.0108918	0.0440665
1131.99	0.0281722	0.0185191	0.0290638	-0.0112872	0.0497248
855.055	0.0282633	0.020345	0.0396905	-0.00690945	0.0562316
813.058	0.0283079	0.0108893	0.0137456	-0.00405878	0.00850319
1237.14	0.0284343	0.0113289	0.0137643	-0.0012208	0.0113563
797.133	0.0285312	0.00960827	0.0143146	0.0338545	-0.000854879
874.981	0.0285497	0.0104282	0.00683235	-0.024519	0.023018
687.935	0.0285533	0.00847779	0.00436891	-0.0320268	0.0266282
653.994	0.0285539	0.00457945	-0.00350559	-0.0340117	0.00782574
705.962	0.0286473	0.00923138	0.0103993	-0.0273885	0.0360969
981.895	0.0286598	0.0111199	0.00833419	-0.0312023	0.0303459
736.923	0.0286801	0.0048425	-0.00379789	-0.0282002	-0.000639664
1147.96	0.0286825	0.0176531	0.0223334	-0.0182265	0.0453453
600.042	0.0286836	0.0198586	0.0360642	0.0277071	0.0243661
1234.14	0.0287118	0.0246964	0.0439704	0.0111542	0.0506394
1024.12	0.028816	0.0179723	0.0308232	0.0315561	0.0203128
1299.06	0.0288291	0.0133665	0.0145028	-0.0147526	0.0263868
618.051	0.028836	0.0162389	0.033206	0.00345348	0.0291613
1044.11	0.0290654	0.0135246	0.0293126	-0.00268048	0.0454007
1030.13	0.0290706	0.0109279	0.0189421	-0.00682289	0.0222257
1609.62	0.0291651	0.00164975	0.00474966	-0.0260089	0.00664399
629.068	0.0292407	0.0150031	0.0269976	-0.0139334	0.0415531
1635.61	0.0293056	-0.00425883	-0.00945705	-0.0337842	-0.0111164
585.062	0.0293379	0.00304461	0.0021363	-0.00677998	-0.0142635
871.03	0.029365	0.0154466	0.0253786	-0.0150119	0.0477569
613.051	0.0294118	0.00278561	-0.00563798	-0.0273031	-0.00542662
1022.12	0.0294314	0.023442	0.0375524	0.0411542	0.0230927
941.956	0.0295799	0.0168798	0.0267876	-0.0197648	0.0508451
880.016	0.0295824	0.00565067	0.00428528	-0.0128478	-0.00561019
1391.77	0.0296474	0.00605188	-6.93364e-05	-0.0343007	0.00857528
1233.14	0.0297019	0.024282	0.0449132	0.0108144	0.0496768
881.029	0.0297441	0.0168629	0.0306792	-0.0124815	0.0503093
1145.96	0.0299028	0.0177277	0.0222122	-0.0182828	0.0455832
1044.1	0.0299538	0.0232805	0.0431225	0.00355934	0.0531276
1212.03	0.0299561	0.00620518	0.0177898	0.00895386	0.0076655
601.986	0.0299593	0.00391421	-0.00364687	-0.0322164	-0.000145963
1023.12	0.0300895	0.0221536	0.0361753	0.0394707	0.021963
644.04	0.0301663	0.00809091	0.0118403	-0.0225132	0.0297028
1593.67	0.0302744	-0.00174901	0.00853002	-0.0235657	0.00893523
938.9	0.030317	0.0102044	0.00624979	-0.0333309	0.0287705
712.914	0.0303342	0.00412024	-0.00555118	-0.0377508	0.00575688
669.017	0.0303421	0.00263238	0.00495155	-0.0196657	0.012225
1335	0.0303992	0.0190068	0.0253535	-0.0129904	0.0433078
591.122	0.030429	0.00817623	0.016954	-0.00438966	0.0149422
716.963	0.0304561	0.0101424	0.0154121	-0.0260012	0.0301487
1129.99	0.0304764	0.0182503	0.0275667	-0.0127301	0.0480402
685.938	0.0305954	0.00898545	0.00457047	-0.0326691	0.0255909
1257.12	0.0306742	0.0189321	0.0312266	-0.00296687	0.042478
1276.08	0.0307215	0.0211932	0.0286828	-0.00109065	0.0370749
1061.07	0.0307391	0.0240029	0.036779	0.00624081	0.0446811
796.131	0.030742	0.012938	0.0169845	0.0402699	0.00137481
754.906	0.0307546	0.00433326	-0.00502359	-0.0337971	0.00279004
564.062	0.0307873	0.00728416	0.0101528	-0.0295828	0.0242612
1086.05	0.0308179	0.01371	0.0183382	-0.0129346	0.0348306
1070.07	0.0308789	0.0189878	0.030953	-0.00382269	0.0453186
795.127	0.0309565	0.0138149	0.0174278	0.04377	0.00307954
897.003	0.0309733	0.0114959	0.0152361	-0.0218391	0.0351364
671.007	0.0310079	0.00853598	0.0075017	-0.0258486	0.0190743
795.041	0.0311502	0.00300551	-0.00576254	-0.0361024	0.0018306
958.924	0.0311957	0.0113719	0.0132134	-0.0286295	0.0388198
1060.06	0.0311962	0.0238451	0.0385318	0.00634588	0.0443996
579.664	0.0312315	-0.00486443	-0.004952	-0.0275386	-0.0152634
568.057	0.0312439	0.00389002	0.00171373	-0.0149323	-0.0104374
1554.68	0.0313777	-0.0067041	-0.0104641	-0.0343603	-0.0172343
956.927	0.0313906	0.0109737	0.0115894	-0.0286953	0.0380603
1463.13	0.0315687	0.0217645	0.0288369	0.00414554	0.033639
1441.64	0.0316239	-0.00428536	-0.00980271	-0.0346761	-0.0146864
586.052	0.0316577	0.000981004	-0.00379695	-0.021405	-0.0127679
738.921	0.0318044	0.00492101	-0.00400802	-0.0293884	-0.00310289
1608.62	0.0320021	0.00135963	0.00853713	-0.0293464	0.00490653
714.967	0.0320478	0.00958102	0.0133046	-0.0259613	0.0265691
608.052	0.0322244	0.00748416	0.0121612	-0.0282848	0.0242092
578.661	0.032358	-0.00405235	-0.00517013	-0.0284476	-0.0140541
631.979	0.0324113	0.00245246	-0.00839373	-0.0388186	-0.000997069
984.888	0.032537	0.0115341	0.00878599	-0.0326786	0.028029
649.996	0.032573	0.00201363	-0.00369113	-0.0373267	-0.000943698
775.884	0.0326148	0.00937005	0.009207	-0.0328458	0.0282344
895.998	0.0326677	0.0167674	0.0221967	-0.0187061	0.0392979
793.043	0.0326739	0.00302668	-0.00504728	-0.0364248	0.00103957
944.943	0.0327253	0.00497676	-0.00209146	-0.0274666	-0.0026476
896.994	0.0327819	0.0168276	0.0224621	-0.0178929	0.0385223
713.908	0.0328139	0.00447715	-0.0040645	-0.0392485	0.00370415
882.026	0.0329243	0.00189422	-0.0021643	-0.0235174	-0.00855029
942.95	0.0329455	0.0172258	0.0294134	-0.0208625	0.0489844
629.979	0.0329671	0.00277269	-0.0066659	-0.0388982	-0.00067434
1303.92	0.0330972	0.0141208	0.022455	-0.0151094	0.0322079
1462.13	0.0331544	0.0211868	0.0287958	0.00236837	0.0315783
884.024	0.0331915	0.00350446	-0.000719864	-0.024229	-0.00365911
833.074	0.0332072	0.0218959	0.0364913	0.0229151	0.0278731
1169.93	0.0332185	0.0125446	0.00837357	-0.027048	0.0257684
665.922	0.0332305	0.00383011	-0.00500698	-0.0394218	0.00188162
1592.67	0.0332391	-0.00233545	0.00927144	-0.0274399	0.00829612
983.894	0.0332594	0.0113475	0.00812967	-0.0329586	0.0275661
1634.61	0.0332793	-0.00630571	-0.0105891	-0.0378864	-0.0182357
834.078	0.0333167	0.0199919	0.0340364	0.0217162	0.0250951
645.034	0.0333756	0.0177922	0.0338987	0.00213457	0.0327223
692.971	0.0333943	0.0047987	0.00108771	-0.023595	-0.0034767
895.004	0.0335104	0.00881408	0.0127893	-0.0248446	0.0297095
644.032	0.0335329	0.0201623	0.0351063	0.00371477	0.0372551
614.047	0.0337764	0.00164874	-0.00518811	-0.0267186	-0.00996788
1573.69	0.0338297	-0.00756	-0.0116739	-0.0385585	-0.0190467
1275.08	0.0338899	0.0211334	0.0282764	-0.00271151	0.0339527
1086.04	0.0339419	0.0196385	0.0255854	-0.00853206	0.0352667
756.903	0.034024	0.00475546	-0.00367804	-0.0357074	0.00193392
689.989	0.0340926	0.0140937	0.026041	-0.0237278	0.0417874
819.102	0.0341451	0.000692939	-0.0040983	-0.024858	-0.011846
851.005	0.0341705	0.0169298	0.0225845	-0.020093	0.0391102
1007.16	0.0342583	0.0165561	0.0353687	0.00895942	0.0330386
631.049	0.0342902	0.00175704	0.00760385	0.00163543	-0.0220983
777.883	0.0344204	0.00945685	0.00975551	-0.0330845	0.0255914
1006.15	0.0345141	0.0175353	0.0386912	0.00946294	0.0366606
880.034	0.0345163	0.0163048	0.0280754	-0.0156251	0.041005
940.953	0.034606	0.0163308	0.0278626	-0.0212763	0.0451635
1303.81	0.0346079	0.0053095	-0.00643633	-0.0410216	0.00423862
628.066	0.0346299	0.01418	0.0296979	-0.0173401	0.0388185
1633.61	0.0346798	-0.00572423	-0.00854197	-0.0389365	-0.0145918
839.032	0.0347173	0.00241435	-0.00433918	-0.0357539	-0.00194052
837.034	0.0348415	0.00181861	-0.00515155	-0.0356785	-0.00278081
1069.08	0.0349072	0.0182553	0.0295659	-0.00525156	0.0381385
629.05	0.0350003	0.00271789	0.00769834	0.000850505	-0.0228312
624.015	0.0350187	0.00928132	0.0127746	-0.0137155	0.00746322
651.996	0.035026	0.00236376	-0.00255096	-0.0389353	0.00118432
667.921	0.0351702	0.00342894	-0.00525652	-0.0397488	0.000110325
1171.93	0.0352955	0.0131335	0.00908075	-0.0281088	0.0246741
817.108	0.035296	0.0169958	0.0371425	-0.00420625	0.042481
1632.61	0.0353687	-0.00562773	-0.00915355	-0.0397529	-0.0140013
1389.78	0.0354522	0.00495313	0.00171651	-0.0336512	0.00260376
757.899	0.0355352	0.00445676	-0.00253973	-0.0359662	0.000217525
1571.68	0.0356092	-0.00686708	-0.0172398	-0.0424505	-0.0215374
1553.68	0.0356786	-0.00717834	-0.0107496	-0.0379011	-0.019307
818.113	0.0357054	0.0154235	0.0336398	-0.0036304	0.0351492
894.996	0.035725	0.0166485	0.0246742	-0.0204554	0.03716
1259.96	0.0357672	0.002689	-0.00811702	-0.0356851	-0.00520325
1570.68	0.0357706	-0.0068577	-0.0174632	-0.0425276	-0.0220188
1085.04	0.0357756	0.0193779	0.0254738	-0.00952817	0.0339385
879.03	0.0357779	0.015653	0.0318192	-0.0174005	0.0426596
709.912	0.0358477	0.00362015	-0.00364566	-0.039367	0.000774982
607.088	0.0359156	0.00929439	0.0129725	0.0047595	0.00531935
670.012	0.0359424	0.00202414	0.00805223	-0.0213023	0.00926052
919.973	0.0359793	0.0111465	0.0107059	-0.0272682	0.020282
921.972	0.0359885	0.0115189	0.0108739	-0.027527	0.0210381
587.073	0.0360065	0.00131312	-0.000419537	-0.022734	-0.0119064
729.927	0.0360328	0.00948458	0.00942681	-0.0353709	0.0226514
695.985	0.0360374	0.00265408	0.00121993	-0.0332478	-0.00133137
1274.08	0.0361258	0.0208877	0.0293784	-0.00339251	0.0318371
1572.68	0.0362224	-0.00778165	-0.0151901	-0.0421923	-0.0215588
1068.07	0.0362734	0.0167618	0.03243	-0.00648601	0.0386181
1301.82	0.0363575	0.00420486	-0.00334565	-0.0400273	0.00148981
1238.14	0.0364023	0.011688	0.0164689	-0.00217872	0.0105843
584.054	0.0364305	-0.00111443	-0.002421	-0.0222186	-0.018639
980.891	0.0364319	0.0112968	0.0101696	-0.0329021	0.0243254
1552.67	0.0364791	-0.00692443	-0.0107144	-0.0380199	-0.0190815
731.927	0.0365195	0.00907594	0.00807756	-0.0346725	0.0205889
1385.79	0.0365248	0.00592856	0.00057425	-0.03401	0.00215251
881.023	0.0365718	-0.000114018	-0.00116841	-0.025166	-0.0141525
590.118	0.0366117	0.00836138	0.0219294	-0.00432265	0.0162334
711.911	0.036757	0.00293248	-0.00318169	-0.0401391	-0.000742204
690.973	0.0367919	0.00502459	0.00366413	-0.0237577	-0.00537698
1273.08	0.0369938	0.020345	0.0308204	-0.0037447	0.0314872
633.061	0.0371312	-0.000857295	-0.0047445	-0.0358517	-0.0109675
668.015	0.0372111	-0.000614446	0.00717567	-0.0211382	0.00700911
606.084	0.0372152	0.0109617	0.0161297	0.00613125	0.00863706
655.042	0.0372251	0.00780668	0.0209212	-0.0177631	0.0196048
607.998	0.0372543	0.00234299	-0.0016941	-0.0341521	-0.00594502
1084.04	0.0372864	0.019143	0.0268889	-0.00970637	0.0332854
753.901	0.037295	0.00331306	-0.00162352	-0.0374972	-0.00138279
713.962	0.0373345	0.00844805	0.0182465	-0.0285283	0.0242632
982.891	0.0373758	0.0109008	0.00994607	-0.0331147	0.0228784
715.961	0.0373817	0.00846609	0.0175202	-0.0281237	0.0238584
1297.83	0.0374239	0.0034229	-0.00402425	-0.0401587	-0.00150064
1299.82	0.0374594	0.000873169	-0.000693171	-0.0410266	-0.00287156
883.021	0.0375764	0.00164251	0.00280578	-0.024549	-0.00915781
652.041	0.0376121	0.0101636	0.0236815	-0.019272	0.0301143
650.992	0.0376231	0.00280893	-0.00464712	-0.0438237	0.00150609
860.05	0.0376702	0.00861181	0.0105865	-0.0183761	0.00870515
1049.09	0.0376748	0.0105059	0.0142587	-0.00658337	0.00874401
607.003	0.0376911	0.00268195	-0.000100325	-0.0348805	-0.00554303
588.067	0.037714	-2.00526e-05	0.00108965	-0.0239838	-0.0136125
651.987	0.0377412	0.00235047	-0.00533136	-0.0433937	0.000519398
755.901	0.0377517	0.00263411	-0.00217962	-0.0377625	-0.00212482
669.009	0.0378453	0.0077508	0.0102375	-0.0287747	0.0130529
696.98	0.0378655	0.00174541	0.00137946	-0.035393	-0.00249037
1237.13	0.0379499	0.0109689	0.018763	-0.000716364	0.00947059
612.047	0.037961	0.000231987	-0.00197689	-0.0301044	-0.0125458
692.984	0.0380138	0.00327859	-0.00143424	-0.0384132	0.00193883
631.062	0.0380419	-0.000636845	-0.00506076	-0.03792	-0.00940261
605.003	0.0380726	0.00263816	0.000247168	-0.0357669	-0.00551106
654.039	0.0380792	0.00825168	0.0228286	-0.0189661	0.024586
630.059	0.0381338	0.00068941	-0.00699948	-0.0395478	-0.00657705
670.003	0.038169	0.00716813	0.0113033	-0.0298157	0.0136744
647.992	0.0381829	0.0026698	-0.00659461	-0.0430368	-0.000823997
1295.82	0.0381984	0.00129395	0.000955234	-0.042006	-0.00338987
648.995	0.0382038	0.00223488	-0.00576424	-0.0432449	-0.000778126
652.992	0.0382406	0.00103281	-0.00420749	-0.0415547	-0.00427596
1111.01	0.0383925	0.0122426	0.0125133	-0.0206316	0.0171841
605.999	0.0384175	0.00318662	-0.000548577	-0.0375222	-0.00295199
632.058	0.0384196	-0.000739615	-0.00696174	-0.0380566	-0.0101118
695.976	0.0384249	0.00269072	-8.83671e-05	-0.0378184	0.000336943
649.989	0.038439	0.00268588	-0.00559302	-0.0431841	-0.00115007
694.983	0.0384967	0.00286961	-0.00115154	-0.0378317	0.000591816
1383.78	0.0385159	0.00151489	0.00262278	-0.0345696	-0.00438458
1109.02	0.038527	0.0113364	0.0119234	-0.0216769	0.0152286
1236.14	0.0385973	0.0101854	0.0186055	-0.00140409	0.00862111
918.97	0.0385977	0.00998442	0.0128924	-0.0296241	0.0182321
693.98	0.0385984	0.00336984	-0.00246869	-0.0375634	0.000236524
653.045	0.0386054	0.00728882	0.0209467	-0.0178479	0.0208594
1387.77	0.0386331	0.00138983	-0.00152648	-0.0348242	-0.00368329
604	0.0386785	0.00310569	-0.000927252	-0.0374138	-0.00371518
920.969	0.0387947	0.01018	0.0130215	-0.0288775	0.0183284
691.98	0.0390125	0.00349354	-0.00132817	-0.0377175	6.41402e-05
1235.13	0.0390872	0.0111572	0.0199558	-0.000881378	0.0103083
586.07	0.0392905	-0.000207751	-0.00111514	-0.0251532	-0.0142778
668.006	0.0393397	0.00759115	0.011076	-0.0308782	0.0160282
1048.09	0.0395307	0.00963569	0.0170543	-0.00484838	0.00848554
1110.01	0.0396111	0.0111905	0.014653	-0.020839	0.0159756
1108.01	0.0397564	0.010113	0.0125991	-0.0222212	0.0143067
1047.1	0.0399714	0.00928208	0.0158977	-0.00540198	0.00789122
859.046	0.0401462	0.00831566	0.0133388	-0.020163	0.0110713
858.051	0.0402552	0.00832119	0.0129777	-0.0202	0.0115193
1046.09	0.0404007	0.0107792	0.0167903	-0.00593657	0.010435
857.049	0.0410211	0.00984028	0.012138	-0.020077	0.0140001
PCA was calculated per each data pixel Using a heuristic peak list of 1,970 peaks derived from total tissue sampling of colorectal cancer.
PCA used unit variance and 5 components. Spatial distribution are reported in Figure S6.
PCA computed with SCiLS software v2024b (Bruker).
PCA, Principal components analysis;
